1 **Mutation of Ebola virus VP35 Ser129 uncouples interferon antagonist**  
2 **and replication functions**

3

4 Morwitzer, MJ<sup>1</sup>, Corona A<sup>2</sup>, Zinzula L<sup>3</sup>, Fanunza E<sup>2</sup>, Nigri C<sup>3</sup>, Distinto S<sup>2</sup>, Vornholt C<sup>1</sup>, Kumar  
5 V<sup>4</sup>, Tramontano E<sup>2</sup>, Reid SP<sup>1\*</sup>

6

7 <sup>1</sup> Department of Pathology and Microbiology, University of Nebraska Medical Center, Omaha,  
8 NE 68198, USA

9 <sup>2</sup>Department of Life and Environmental Sciences, University of Cagliari, Italy

10 <sup>3</sup>The Max-Planck Institute of Biochemistry, Department of Molecular Structural Biology, Am  
11 Klopferspitz 18, 82152 Martinsried, Germany

12 <sup>4</sup>Mass Spectrometry and Proteomics Core Facility, University of Nebraska Medical Center,  
13 Omaha NE, 68198, USA

14

15

16 \*Corresponding author- St Patrick Reid- Patrick.reid@unmc.edu

17

18 **Abstract**

19 Ebolaviruses are non-segmented, negative-sense RNA viruses (NNSVs) within the order  
20 *Mononegavirales* that possess the multifunctional virion protein 35 (VP35), a major determinant  
21 of virulence and pathogenesis that is indispensable for viral replication and host innate immune  
22 evasion. VP35 is functionally equivalent to the phosphoprotein (P) of other mononegaviruses  
23 such as rhabdoviruses and paramyxoviruses. Phosphorylation of the P protein is universally  
24 regarded as functionally important however, a regulatory role(s) of phosphorylation on VP35  
25 function remains unexplored. Here, we identified a highly conserved Ser129 residue near the  
26 homo-oligomerization coiled coil motif, which is essential for VP35 functions. Affinity-purification  
27 MS followed by post-translational modification (PTM) analysis predicted phosphorylation of  
28 Ser129. Co-immunoprecipitation, cross-linking, and biochemical characterization studies  
29 revealed a moderately decreased capacity of VP35-S129A to oligomerize. Functional analysis  
30 showed that Ser-to-Ala substitution of Ebola virus (EBOV) VP35 did not affect IFN inhibitory  
31 activity but nearly abolished EBOV minigenome activity. Further coimmunoprecipitation studies  
32 demonstrated a lost interaction between VP35-S129A and the amino terminus of the viral  
33 polymerase but not between viral nucleoprotein (NP) or VP35-WT. Taken together, our findings  
34 provide evidence that phosphorylation modulates VP35 function, supporting VP35 as a NNSV P  
35 protein and providing a potentially valuable therapeutic target.

36 **Importance**

37 Ebola virus (EBOV) can cause severe disease in humans. The 2013-2016 West African  
38 epidemic and the two recent outbreaks in the Democratic Republic of the Congo underscore the  
39 urgent need for effective countermeasures, which remain lacking. A better understanding of  
40 EBOV biology and the modulation of multifunctional viral proteins is desperately needed to  
41 develop improved therapeutics. We provide evidence here that function of virion protein 35  
42 (VP35) is modulated by phosphorylation of Ser129, a conserved residue among other  
43 ebolavirus species. These findings shed light on EBOV biology and present a potential target for  
44 broad acting anti-ebolavirus therapeutics.

45

46

47

48

49

50

51

52

53

## 54 Introduction

55 Ebolaviruses are zoonotic pathogens associated with severe hemorrhagic disease in humans  
56 (Messaoudi et al., 2015, Nelson et al., 2017). The genus *Ebolavirus*, which is of the family  
57 *Filoviridae* and order *Mononegavirales*, includes six species of filamentous, enveloped, non-  
58 segmented negative-sense RNA viruses (NNSVs): Ebola (EBOV), Sudan (SUDV), Reston  
59 (RESTV), Tai Forest (TAFV), Bundibugyo (BDBV), and Bombali (BOMV) viruses (Feldmann et  
60 al., 2013, Kuhn, 2017, Goldstein et al., 2018). Among these, EBOV has caused the most  
61 substantial outbreaks, along with SUDV and BDBV (Messaoudi et al., 2015). Once sporadic,  
62 EBOV outbreaks have become increasingly frequent and large, as evidenced by the  
63 unprecedented 2013-2016 West African epidemic and the 2017 and currently ongoing  
64 outbreaks in the Democratic Republic of the Congo (WHO, 2016, CDC, 2018). Even with  
65 several promising therapeutic candidates under investigation, there remains no licensed  
66 therapeutics available to prevent or treat infection (Keshwara et al., 2017, Cross et al., 2018,  
67 Fanunza et al., 2018a). Thus, continued efforts to identify and develop therapeutics, particularly  
68 those with pan-filovirus efficacy, should be a priority.

69 The ebolavirus genome is approximately 19 kb and encodes nine proteins, among which the  
70 multifunctional virion protein 35 (VP35) is a major determinant of virulence and pathogenesis  
71 (Leung et al., 2010b, Feldmann et al., 2013, Messaoudi et al., 2015). VP35 is a potent immune  
72 antagonist, inhibiting interferon- $\alpha/\beta$  (IFN- $\alpha/\beta$ ) production, activation of the IFN-inducible protein  
73 kinase R (PKR) antiviral protein, and RNA interference (Basler et al., 2000, Basler et al., 2003,  
74 Feng et al., 2007, Schumann et al., 2009, Haasnoot et al., 2007, Fabozzi et al., 2011). VP35  
75 inhibits retinoic acid-inducible gene I (RIG-I)-like receptor signaling and IFN- $\alpha/\beta$  production by  
76 several mechanisms, including sequestering immunostimulatory double-stranded RNA (dsRNA)  
77 intermediates, inhibiting PACT-induced RIG-I ATPase activity, preventing kinases TANK-binding  
78 kinase 1 (TBK1), and/or IB kinase epsilon (IKK $\epsilon$ ) from activating interferon regulatory factors 3  
79 and 7 (IRF3/IRF7), inactivating IRF7 by SUMOylation, and inhibiting TRIM6-mediated type I IFN  
80 production (Cardenas et al., 2006, Bale et al., 2013, Dilley et al., 2017, Luthra et al., 2013, Prins  
81 et al., 2009, Hartman et al., 2008, Chang et al., 2009, Bharaj et al., 2017). In addition to immune  
82 suppression, VP35 also functions as an essential cofactor of the viral RNA-dependent RNA  
83 polymerase (named L for large polymerase protein). The functional viral polymerase complex is  
84 comprised of nucleoprotein (NP) and VP30 in addition to L and VP35 (Muhlberger et al., 1998,  
85 Muhlberger et al., 1999, Prins et al., 2010). VP35 is thought to act as a bridge between the  
86 catalytic subunit of L and the NP-associated viral RNA, thus VP35-L and VP35-NP interactions  
87 are likely both essential for viral RNA synthesis (Becker et al., 1998, DiCarlo et al., 2007,  
88 Trunschke et al., 2013, Kirchdoerfer et al., 2015, Leung et al., 2015). Moreover, VP35 serves as  
89 a structural protein that is necessary, along with NP and VP24, for nucleocapsid formation  
90 (Huang et al., 2002, Shi et al., 2008, Takamatsu et al., 2018). Furthermore, a recent study  
91 identified novel NTPase and helicase-like activities of EBOV VP35, which suggests VP35 may  
92 also participate in viral RNA remodeling activity (Shu et al., 2019). The N-terminus of VP35  
93 contains a NP-chaperoning domain as well as a homo-oligomerization domain, and the C-  
94 terminus contains a dsRNA/IFN inhibitory domain (RBD/IID) (Kirchdoerfer et al., 2015, Leung et  
95 al., 2015, Reid et al., 2005, Bale et al., 2012, Bale et al., 2013, Kimberlin et al., 2010, Leung et  
96 al., 2009a, Leung et al., 2009b, Leung et al., 2010c, Leung et al., 2010a, Leung et al., 2010d,

97 Ramanan et al., 2012). Homo-oligomeric organization of VP35 occurs via a predicted coiled-coil  
98 motif in the homo-oligomerization domain, and is known to be required for replication and full  
99 IFN antagonism (Reid et al., 2005, Moller et al., 2005). All ebolavirus VP35s form tetramers,  
100 whereas only the oligomerization domain of EBOV VP35 (eVP35) is able to form trimers  
101 (Zinzula et al., 2019b, Chanthamontri et al., 2019).

102 Filovirus VP35 is the functional equivalent to the phosphoprotein (P) of other members of the  
103 order *Mononegavirales*, which also includes families such as *Rhabdoviridae*, *Paramyxoviridae*,  
104 and *Bornaviridae*. As its name suggests, P protein is the most highly phosphorylated viral  
105 protein in any infected cell or virion of mononegaviruses. Phosphorylation of P protein is  
106 universally regarded as functionally important, with increasing experimental support. Thus far,  
107 phosphorylation has been shown to modulate P protein function of vesicular stomatitis virus  
108 (VSV) (Chattopadhyay and Banerjee, 1987, Barik and Banerjee, 1991, Barik and Banerjee,  
109 1992a, Barik and Banerjee, 1992b, Gao and Lenard, 1995, Gao et al., 1996, Pattnaik et al.,  
110 1997, Das and Pattnaik, 2004), respiratory syncytial virus (RSV) (Barik et al., 1995, Asenjo and  
111 Villanueva, 2000, Villanueva et al., 2000, Asenjo et al., 2006, Asenjo et al., 2008, Asenjo and  
112 Villanueva, 2016), Chandipura virus (CHPV) (Chattopadhyay et al., 1997, Raha et al., 1999,  
113 Raha et al., 2000), Borna disease virus (BDV) (Schmid et al., 2007), parainfluenza virus 5  
114 (PIV5) (Timani et al., 2008), Rabies virus (RABV) (Moseley et al., 2007), Rinderpest (RPV)  
115 (Saikia et al., 2008), measles virus (MV) (Sugai et al., 2012), mumps virus (MuV) (Pickar et al.,  
116 2014), and Newcastle disease virus (NDV) (Qiu et al., 2016). However, it is unknown whether  
117 the function of filovirus P protein is regulated by phosphorylation. Of note, although all P  
118 proteins are thought to perform similar transcriptional and replication functions, there is  
119 surprisingly little sequence homology, even between the Indiana and New Jersey serotypes of  
120 VSV. EBOV VP35 is known to be moderately phosphorylated (Elliott et al., 1985, Prins et al.,  
121 2009). Accordingly, it might be expected that phosphorylation of VP35 is functionally important.

122 In this study, we aimed to further elucidate modulation of VP35 function by evaluating it as a  
123 NNSV P protein. We used affinity purification-mass spectrometry (AP-MS) to identify putative  
124 post-translational modifications (PTMs) of VP35. Phosphorylation was predicted for a highly  
125 conserved Ser129 residue proximal to the homo-oligomerization domain. Oligomerization  
126 studies indicated that an alanine mutant VP35-S129A had moderately reduced ability to homo-  
127 oligomerize. Further functional studies revealed that while the mutant retained IFN antagonist  
128 activity, minigenome activity was nearly abolished. VP35-NP and VP35-L interactions were  
129 interrogated by co-immunoprecipitation (co-IP) and immunofluorescence (IF) experiments.  
130 While VP35-NP interaction remained intact, VP35-L was abrogated, indicating that  
131 phosphorylation of VP35 at S129 is crucial to the ability of VP35 to interact with L. These  
132 results support VP35 as a NNSV P protein and further elucidate the regulation of VP35  
133 functions, potentially offering a novel pan-filovirus therapeutic target.

## 134 **Methods**

### 135 *Antibodies*

136 Mouse anti-HA (H3663), rabbit anti-HA (H6908), mouse anti-FLAG (F3165), rabbit anti-FLAG  
137 (F7425), rabbit anti-ISG56 (SAB1410690), and mouse anti-Calnexin (C7617) antisera were

138 purchased from Sigma-Aldrich (ST. Louis, MO, USA). Rabbit anti-VP35 (GTX134032) was  
139 purchased from GeneTex (Irvine, CA, USA). Mouse anti-His (TA150088) was purchased from  
140 OriGene (Rockville, MD, USA). Rabbit anti-L was purchased from IBT BioServices (Rockville,  
141 MD, USA). Goat anti-rabbit HRP (65-6120), goat anti-mouse HRP (32430), goat anti-mouse  
142 Alexa Fluor 488 (A32723), goat anti-rabbit Alexa Fluor 568 (A11011), and Hoechst 33342  
143 (H3570) were purchased from ThermoFisher Scientific (Grand Island, NY, USA).

#### 144 *Cell lines and viral RNA production*

145 HeLa, HEK293T, and A549 cells were grown in Dulbecco's modified Eagle's medium (Gibco)  
146 supplemented with 10% fetal bovine serum (Gibco) and 1% penicillin/streptomycin (Sigma).  
147 Cells were maintained at 37°C in a humidified 5% CO<sub>2</sub> incubator. Viral RNA (vRNA) was  
148 produced in A549 cells, infected with IAV/Puerto-Rico/8/34 (IAV PR8) strain at a multiplicity of  
149 infection of 5. Five hours after infection, total RNA was isolated using the RNeasy® Kit from  
150 Qiagen (Hilden, Germany). TRIzol™ Reagent was purchased from Thermo Fisher Scientific.

#### 151 *Plasmids and Reagents*

152 Plasmid pGL-IFN-β-luc was kindly provided by Professor Stephan Ludwig, Institute of Molecular  
153 Virology, University of Münster, Germany). pRL-TK was purchased from Promega (Promega  
154 Italia S.r.l. Milan, Italy). pcDNA3-EBOV VP35, carrying EBOV VP35 gene from Zaire species  
155 (1976 Yambuku-Mayinga strain) was constructed as previously reported (Cannas et al., 2015).  
156 The VP35-S129A substitution was introduced in the pcDNA3-EBOV VP35 plasmid using the  
157 QuikChange mutagenesis kit by following the manufacturer's instructions (Agilent Technologies  
158 Inc., Santa Clara, CA). Primers' sequences: VP35-S129A Forward: 5'-  
159 GATATGGCAAAAACAATCGCCTCATTGAACAGGGTTTG-3'; VP35-S129A reverse: 5'-  
160 CAAACCCTGTTCAATGAGGCGATTGTTTTTGGCATATC-3'. pCAGGS-HA-EBOV-NP was  
161 purchased from BEI (NR-49343). pCAGGS-NP-V5, pCAGGS-V5-VP30, and pcDNA3 vectors  
162 were generated at the USAMRIID. pCAGGS-FLAG-VP35 and pCAGGS-L\_1-505 were a kind  
163 gift from Dr. Christopher F. Basler (Georgia State University). pCAGGS\_L\_EBOV and  
164 pCAGGS\_3E5E\_luciferase were gifts from Dr. Elke Mühlberger (Addgene plasmid # 103052; #  
165 103055) (Nelson et al., 2017).

166 jetPRIME transfection reagent was purchased from Polyplus-transfection (S.A., Illkirch,  
167 France). T-Pro P-Fect Transfection Reagent was purchased from T-Pro Biotechnology (New  
168 Taipei County, Taiwan). Lipofectamine 2000 and Lipofectamine 3000 were purchased from  
169 Thermo Fisher Scientific. D-luciferin and Coelenterazine were purchased from Gold  
170 Biotechnology (U.S. Registration No 3,257,927). Primers were purchased from (Metabion,  
171 Planegg, Germany). The Dual-Glo Luciferase Assay System (E2920) was purchased from  
172 Promega (Madison, WI, USA) and used per manufacturer's instructions.

#### 173 *Viral sequences*

174 The following filovirus sequences were used for sequence comparison and/or cloning where  
175 indicated: EBOV (*Zaire ebolavirus* isolate Ebola virus/H.sapiens-tc/COD/1976/Yambuku-  
176 Mayinga, GenBank: NC\_002549.1), SUDV (*Sudan ebolavirus* isolate Sudan virus/H.sapiens-

177 tc/UGA/2000/Gulu-808892, GenBank: NC\_006432.1), RESTV (*Reston ebolavirus* isolate  
178 Reston virus/M.fascicularis-tc/USA/1989/Philippines89-Pennsylvania, GenBank: NC\_004161.1),  
179 TAFV (*Tai Forest ebolavirus* isolate Tai Forest virus/H.sapiens-tc/CIV/1994/Pauleoula-CI,  
180 GenBank: NC\_014372.1), BDBV (*Bundibugyo ebolavirus* isolate Bundibugyo virus/H.sapiens-  
181 tc/UGA/2007/Butalya-811250, GenBank: NC\_014373.1), BOMV (*Bombali ebolavirus* isolate  
182 Bombali ebolavirus/Mops condylurus/SLE/2016/PREDICT\_SLAB000156, GenBank:  
183 NC\_039345.1). Multiple sequence alignment was made by Clustal Omega (Sievers and  
184 Higgins, 2018).

### 185 *Mass spectrometry analysis*

186 Affinity-tagged VP35 was overexpressed in HeLa cells using Lipofectamine 2000 as per  
187 manufacturer's instruction. Affinity purified material was resolved by SDS-PAGE and stained  
188 with Coomassie (ThermoFisher Scientific). The stained protein band corresponding to protein of  
189 interest was excised and processed for in-gel digestion at the UNMC proteomics facility using  
190 the protocol of Shevchenko and colleagues (Shevchenko et al., 2006). Extracted peptides were  
191 re-suspended in 2% acetonitrile (ACN) and 0.1% formic acid (FA) and loaded onto trap column  
192 Acclaim PepMap 100 75µm x 2 cm C18 LC Columns (Thermo Scientific™) at flow rate of 4  
193 µl/min then separated with a Thermo RSLC Ultimate 3000 (Thermo Scientific™) on a Thermo  
194 Easy-Spray PepMap RSLC C18 75µm x 50cm C-18 2 µm column (Thermo Scientific™) with a  
195 step gradient of 4–25% solvent B (0.1% FA in 80 % ACN) from 10-57 min and 25–45% solvent  
196 B for 57–62 min at 300 nL/min and 50°C with a 90 min total run time. Eluted peptides were  
197 analyzed by a Thermo Orbitrap Fusion Lumos Tribrid (Thermo Scientific™) mass spectrometer  
198 in a data dependent acquisition mode. A survey full scan MS (from m/z 350–1800) was  
199 acquired in the Orbitrap with a resolution of 120,000. The AGC target for MS1 was set as  
200  $4 \times 10^5$  and ion filling time set as 100 ms. The most intense ions with charge state 2-6 were  
201 isolated in 3 s cycle and fragmented using HCD fragmentation with 40 % normalized collision  
202 energy and detected at a mass resolution of 30,000 at 200 m/z. The AGC target for MS/MS was  
203 set as  $5 \times 10^4$  and ion filling time set 60 ms dynamic exclusion was set for 30 s with a 10 ppm  
204 mass window. Protein identification was performed by searching MS/MS data against the swiss-  
205 prot human protein database downloaded on Aug 20, 2018. The search was set up for full  
206 tryptic peptides with a maximum of two missed cleavage sites. Acetylation of protein N-terminus  
207 and oxidized methionine were included as variable modifications and carbamidomethylation of  
208 cysteine was set as fixed modification. The precursor mass tolerance threshold was set 10 ppm  
209 for and maximum fragment mass error was 0.02 Da. Qualitative analysis was performed using  
210 PEAKS 8.5 software. The significance threshold of the ion score was calculated based on a  
211 false discovery rate of  $\leq 1\%$ .

### 212 *Co-immunoprecipitations (co-IPs)*

213 HeLa cells ( $1 \times 10^6$  cells) were transfected with the indicated plasmids using 3 µL of the  
214 transfection reagent jetPRIME (Polyplus) per 1 µg DNA per manufacturer's instructions. The  
215 total amount of DNA for each transfection was kept constant in each experiment by  
216 complementing with empty vector. Twenty-four h post-transfection, cells were lysed in a  
217 modified RIPA buffer (50 mM Tris-HCl pH 7.4, 150 mM NaCl, 1mM EDTA, 1% NP-40, 0.25%

218 Na-deoxycholate) containing protease and a phosphatase inhibitor cocktail (Thermo Scientific,  
219 Waltham, MA, USA). Approximately 10% WCL was reserved for IB analysis before performing  
220 co-IPs. To immunoprecipitate indicated proteins, lysates were incubated with EZview Red ANTI-  
221 FLAG M2 Affinity Gel (Sigma) or EZview Red Anti-HA Affinity Gel (Sigma) for 1 h at 4 °C. Beads  
222 were washed 4 to 5 times with TBS, re-suspended in 2X Lane Marker Reducing Sample Buffer  
223 (Thermo Scientific), and then subjected to SDS-PAGE and immunoblotting, as indicated below.

#### 224 *Immunoblotting (IB)*

225 Cell lysates were subjected to reducing SDS-PAGE and proteins were transferred onto PVDF  
226 membranes. Blots were probed with indicated primary antibodies either 1–2 h at RT or overnight  
227 at 4°C. Secondary incubations were performed for 1–2 h at RT using either goat anti-rabbit HRP  
228 or goat anti-mouse HRP. Radiance chemiluminescence substrate (Azure Biosystems; Dublin,  
229 CA, USA) was used to visualize protein on an Azure c600 imaging system.

#### 230 *DSP Crosslinking*

231 HeLa cells were transfected with VP35-WT or VP35-S129A plasmids as previously indicated.  
232 Twenty-four h post-transfection the cells were incubated in a PBS reaction buffer with or without  
233 the Dithiobis(succinimidylpropionate) DSP cross-linker (Thermo Scientific) at final concentration  
234 of 1 mM for 30 min at RT. The reaction was quenched by the addition of a stop solution (1M  
235 Tris-HCl pH 7.5) for 15 min. The cells were subsequently lysed in the modified RIPA buffer and  
236 resuspended in a non-reducing sample buffer (Thermo Scientific) and subjected to SDS-PAGE  
237 and immunoblot analysis.

#### 238 *Molecular cloning, expression and purification of recombinant proteins*

239 Constructs encoding for the recombinant EBOV (Zaire ebolavirus, Yambuku-Mayinga,  
240 GenBank: NC\_002549.1) WT and S129A VP35 oligomerization domains (residues 83-175)  
241 were subcloned into pET21b vectors (Novagen) from synthetic DNA preparations (BioCat), then  
242 expressed in *E.coli* BL21 (DE3) cells and purified by affinity and size-exclusion chromatography  
243 as previously described (Zinzula et al 2019). Briefly, heat-shock transformed bacterial cells were  
244 grown in LB medium (Carl-Roth) at 37 °C and 200 rpm up to 0.8 optical density at 600 nm, then  
245 induced at 20 °C with 0.5 mM isopropyl b-D-1-thiogalactopyranoside (IPTG) (Carl-Roth) for 16  
246 hours. Proteins were purified by affinity on a 1 mL complete HisTag Purification Column (Roche)  
247 and by size-exclusion on a Superose 12 10/300 GL (GE Healthcare) column, respectively.

#### 248 *Miniaturized differential scanning fluorimetry (nanoDSF)*

249 NanoDSF was performed by using a Prometheus NT.48 nanoDSF instrument (NanoTemper  
250 Technologies). Recombinant EBOV VP35 WT and S129A oligomerization domains were diluted  
251 at 2.5 mg/mL in 25 mM tris-HCl pH 7.4, 150 mM NaCl, 2 mM MgCl<sub>2</sub> and loaded on 10 µL  
252 standard UV capillaries. Measurement of the intrinsic protein fluorescence at 330 and 350 nm  
253 wavelength was performed over a 20-95 °C thermal gradient run at 0.5 °C/min rate. Melting  
254 temperature (T<sub>m</sub>) values were determined as the first derivative maxima of the intrinsic  
255 fluorescence 330/350 nm ratio functions. Data were averaged from at least three independent  
256 experiments.

257 *Circular dichroism (CD) spectroscopy and secondary structure content analysis*

258 CD spectroscopy was performed on a J-715 spectropolarimeter (Jasco) flushed with N<sub>2</sub> and  
259 equipped with a PDF 3505 Peltier thermostat (Jasco). Purified recombinant EBOV VP35 WT  
260 and S129A oligomerization domains were diluted at 0.1 mg/mL in 25 mM tris-HCl pH 7.4, 150  
261 mM NaCl, 2 mM MgCl<sub>2</sub> and transferred to a high-precision 1-mm pathlength quartz cuvette  
262 (Helma Analytics). Wavelength scans were recorded between 190 and 250 nm, at 4 °C, 23 °C  
263 and 37 °C, at 50 nm/min scanning speed with 1 s response time and 0.1 nm data pitch, each  
264 spectrum being the average of four accumulations. Mean molar residue ellipticity (MRE) values  
265 were calculated as  $MRE = [\theta] = 3300 m\Delta A/lcn$ , where  $m$  is the molecular mass in Daltons,  $A$  is  
266 the absorbance,  $l$  is the path length in centimeters,  $c$  is the protein concentration expressed in  
267 milligrams per milliliter and  $n$  is the number of amino acid residues. Data processing for  
268 secondary structure content determination was performed by using the CONTINLL  
269 deconvolution method and the SMP56 reference set implemented in the Spectra Manager  
270 software package.

271 *Size exclusion chromatography (SEC) and multi-angle light scattering (MALS)*

272 SEC-MALS was performed on a Superdex 200 10/300 GL gel filtration column (GE Healthcare),  
273 connected to a 1100 HPLC system with variable UV absorbance detector set at 280 nm (Agilent  
274 Technologies) and coupled in line with a mini DAWN TREOS MALS detector and an Optilab  
275 rEX refractive-index detector (Wyatt Technology, 690 nm laser). Purified recombinant EBOV  
276 VP35 WT and S129A oligomerization domains (~50 to 100 µg) were loaded by autoinjection  
277 and run at 23 °C and 0.5 mL/min flow rate in 25 mM tris-HCl pH 7.4, 150 mM NaCl, 2 mM  
278 MgCl<sub>2</sub>. Protein absolute molecular masses were calculated with the ASTRA 6 software (Wyatt  
279 Technology) with the  $dn/dc$  value set to 0.185 mL/g. Bovine serum albumin (ThermoFisher) was  
280 used as calibration standard. Data were averaged from at least two independent experiments.

281 *Computational modeling*

282 The coordinates for the oligomerization domain of VP35 from Ebola virus were taken from the  
283 RCSB Protein Data Bank (Berman et al., 2000) as reported in the entry 6GBO.(Zinzula et al.,  
284 2019a) The structure processing and optimization were carried out by means of Maestro Protein  
285 Preparation Wizard default setting (2018). Original water molecules were removed. After  
286 preparation, the structure was refined to optimize the hydrogen bond network using OPLS\_2005  
287 force field.(Kaminski et al., 2001). S129A mutation was generated starting from VP35-WT.  
288 Therefore, the mutant geometry was optimized with a full minimization protocol considering  
289 OPLS\_2005 force field (Kaminski et al., 2001) and GB/SA implicit water, setting 10000 steps  
290 interactions analysis with Polak-Ribier Coniugate Gradient (PRCG) method and a convergence  
291 criterion of 0.1 kcal/(molÅ).

292 *Luciferase reporter gene assay for IFN promoter activation*

293 The luciferase reporter gene assay for IFN promoter activation was adapted from (Fanunza et  
294 al., 2018b). HEK293T cells ( $1.5 \times 10^4$  cells/well) were seeded in 96-well plates 24 h before  
295 transfection. Cells were transfected using T-Pro P-Fect Transfection Reagent, according to the



296 manufacturer's protocol. Plasmids pGL-IFN- $\beta$ -luc (60 ng), pRL-TK (10 ng), and various dilutions  
297 (100, 10, 1.0, 0.1, 0.01 ng) of pcDNA3 vector control (VC), pcDNA3\_VP35-WT, or  
298 pcDNA3\_VP35-S129A were mixed with the transfection reagent in reduced serum medium  
299 Optimem (Gibco) and incubated 20 min at RT. Transfection complexes were then gently added  
300 into individual wells of the 96-well plate. Twenty-four hours after transfection, cells were  
301 stimulated with influenza A virus (IAV)-RNA, pre-mixed with the transfection reagent in reduced  
302 serum medium Optimem, and incubated for 24 h at 37 °C in 5% CO<sub>2</sub>. Cells were harvested with  
303 lysis buffer (50 mM Na-MES [pH 7.8], 50 mM Tris-HCl [pH 7.8], 1 mM dithiothreitol, and 0.2%  
304 Triton X-100). To lysates were added luciferase assay buffer (125 mM Na-MES [pH 7.8], 125  
305 mM Tris-HCl [pH 7.8], 25 mM magnesium acetate, and 2.5 mg/mL ATP). Immediately after  
306 addition of 50  $\mu$ l of Luciferin buffer (25 mM D-luciferin, 5 mM KH<sub>2</sub>PO<sub>4</sub>) the luminescence was  
307 measured in Victor3 luminometer (Perkin Elmer), and again after addition of 50  $\mu$ l of  
308 Coelenterazine assay buffer (125 mM Na-MES [pH 7.8], 125 mM Tris-HCl [pH 7.8], 25 mM  
309 magnesium acetate, 5 mM KH<sub>2</sub>PO<sub>4</sub> and 10  $\mu$ M Coelenterazine). Relative light units (RLU) of  
310 firefly luciferase signal were normalized to *Renilla* luciferase, with percentage of IFN induction  
311 values calculated relative to unstimulated controls (indicated as 100%). Each assay was  
312 performed in triplicate. Mean  $\pm$  standard deviation (SD) values and paired, two-tailed t tests  
313 were calculated using GraphPad Prism 6.01 software (GraphPad Software, Inc.; San Diego,  
314 CA, USA).

#### 315 *RT-PCR assay for ISG expression*

316 HEK293T cells (3  $\times$  10<sup>5</sup> cells/well) resuspended Dulbecco's modified Eagle's medium  
317 supplemented with 10% fetal bovine serum were seeded in 6-well plates, pre-treated with 500  $\mu$ l  
318 of Poly-D-lysine hydrobromide 100 $\mu$ g/ml for 1 h. After 24 h cells were transfected with 2500 ng  
319 of plasmid (pcDNA3 vector control (VC), pcDNA3\_VP35-WT, or pcDNA3\_VP35-S129A) using  
320 Lipofectamine 3000 transfection reagent, as per manufacturer's instruction. Twenty-four h after  
321 transfection, cells were stimulated with 2500 ng of IAV-RNA, pre-mixed with the transfection  
322 reagent in reduced serum medium Optimem, and incubated for 24 hours at 37 °C in 5% CO<sub>2</sub>.  
323 Total RNA was extracted from transfected cells with TRIzol® Reagent (Invitrogen). RNA was  
324 then reverse transcribed and amplified using Luna Universal One-Step RT- qPCR kit (New  
325 England Biolabs; Ipswich, MA, USA). Quantitative real-time PCR (RT-qPCR) experiments were  
326 performed in triplicate in a CFX-96 Real-Time system (BioRad; Hercules, CA, USA). Primers  
327 used: GAPDH Forward 5'-GAGTCAACGGATTTTGGTCGT-3', GAPDH Reverse 5'-  
328 TTGATTTTGGAGGGATCTCG-3'; ISG15 Forward 5'-TCCTGGTGAGGAATAACAAGGG-3';  
329 ISG15 Reverse 5'-CTCAGCCAGAACAGGTCTGTC-3'; 2'5'OAS Forward 5'-  
330 AGCTTCATGGAGAGGGGCA-3'; 2'5'OAS Reverse 5'-AGGCCTGGCTGAATTACCCAT-3'.  
331 Data were analyzed with Opticon Monitor 3.1. mRNA expression levels were normalized to the  
332 level of glyceraldehyde-3-phosphate dehydrogenase (GAPDH), with percentage of gene  
333 expression over the VC (indicated as 100%). Mean  $\pm$  standard deviation values of two replicates  
334 and paired, two-tailed t tests were calculated using GraphPad Prism 6.01 software.

#### 335 *Immunoblot for ISG56 expression*

336 HeLa cells ( $1 \times 10^6$  cells) were transfected with the indicated plasmids using 2  $\mu$ L of the  
337 transfection reagent Lipofectamine 2000 (Thermo Fisher Scientific) per 1  $\mu$ g DNA per  
338 manufacturer's instructions. Twenty four h post-transfection the cells were mock treated or  
339 treated with 10  $\mu$ g/mL of poly I:C (InvivoGen). Twenty-four h post-treatment cells were  
340 harvested, lysed in modified RIPA buffer and subjected to SDS-PAGE and immunoblot as  
341 aforementioned with the indicated antibodies.

#### 342 *Minigenome Assay*

343 A RNA polymerase II-driven EBOV minigenome was used as previously described (Nelson et  
344 al., 2017). Briefly, HeLa cells ( $3.0 \times 10^5$ ) were seeded in 12-well plates 24 h before transfection.  
345 Cells were transfected with minigenome components (125 ng pCAGGS-HA-NP, 125 ng  
346 pCAGGS-FLAG-VP35, 50 ng pCAGGS-V5-VP30, 500 ng pCAGGS-L, and 750 ng of pCAGGS-  
347 3E5E-luciferase) along with 50 ng pRL-TK (for transfection efficiency control) using jetPRIME  
348 reagent as per manufacturer's recommendation. For the no L control, total DNA levels were  
349 kept constant by complementing transfections with empty-vector pcDNA3. Reporter activity was  
350 measured 48 h post-transfection using the Dual-Glo Luciferase Assay System and a Tecan  
351 Spark microplate luminometer (Tecan Trading AG, Switzerland). Whole cell lysate (WCL) was  
352 reserved from a representative replicate and subjected to immunoblotting as described below.  
353 To account for potential differences in transfection efficiency, firefly luciferase activity was  
354 normalized to *Renilla* luciferase values and plotted as fold activity calculated relative to the no L  
355 control. Mean  $\pm$  standard error of the mean (SEM) values and paired, two-tailed t tests were  
356 calculated using GraphPad Prism 7.05 software.

## 357 **Results**

### 358 *EBOV VP35 homo-oligomerization domain contains a putative regulatory serine* 359 *phosphorylation site*

360 Given that VP35 is analogous to the phosphoprotein of rhabdoviruses and paramyxoviruses, we  
361 first sought to examine EBOV VP35 for sites of phosphorylation by mass spectrometry (MS).  
362 Affinity-tagged VP35 was over-expressed in HeLa cells and isolated by immunoaffinity  
363 purification. Among predicted phosphorylation sites identified by MS analysis, Ser129 was  
364 chosen to evaluate for regulatory phosphorylation function due to its position, which lies just  
365 outside the coiled-coil region responsible for VP35 homo-oligomerization (Figure 1A and C).  
366 Moreover, multiple sequence alignment of all ebolavirus species revealed conservation among  
367 all ebolavirus species except BOMV (Figure 1B). BOMV is a newly identified ebolavirus species  
368 and has not yet been shown to be pathogenic in humans. All other ebolaviruses except RESTV  
369 are pathogenic in humans, thus we reasoned the conservation of Ser129 may be functionally  
370 important. Accordingly, it was hypothesized that Ser129 plays an important regulatory role for  
371 VP35 as a NNSV P protein.

### 372 *VP35-S129A has moderately diminished oligomerization capacity*

373 Homo-oligomerization of VP35 is known to be required for both replication and contributes to  
374 anti-IFN functions (Reid et al., 2005, Moller et al., 2005). Thus, we sought to determine whether

375 Ser129 impacts the ability of VP35 to oligomerize. Using a non-phosphorylated mimic of VP35  
376 generated by alanine substitution at Ser129 (VP35-S129A), we first evaluated the ability of  
377 VP35-S129A to interact with VP35-WT. HeLa cells were transfected with HA-VP35-WT or His-  
378 VP35-S129A alone and in combination with FLAG-VP35-WT. After 24 h, proteins were  
379 extracted and immunoprecipitations (IPs) using anti-FLAG beads were performed. IP samples  
380 and whole cell lysates (WCLs) were then subjected to SDS-PAGE and products were analyzed  
381 by immunoblot. As expected, HA-VP35-WT was shown to be pulled down only in the presence  
382 of FLAG-VP35-WT, demonstrating specificity of binding (Figure 2A, top panels). Similarly, His-  
383 VP35-S129A was also pulled down in the presence of FLAG-VP35-WT, indicating that the  
384 VP35-S129A mutant retains the ability to self-associate. Appropriate protein expression was  
385 confirmed by WCL analysis (Figure 2A, bottom panels).

386 To next evaluate VP35-S129A oligomerization ability, we performed cross-linking experiments,  
387 along with a series of biochemical studies. VP35-WT and VP35-S129A were separately over-  
388 expressed in HeLa cells for 24 h. Following cross-linking with Dithiobis(succinimidylpropionate)  
389 (DSP), the oligomeric forms of VP35 were analyzed by immunoblot under non-reducing,  
390 unboiled conditions. After cross-linking with DSP, VP35-WT had a marked increase in higher  
391 oligomeric forms, as well as a modest decrease in monomeric form, relative to that of the non-  
392 DSP treated VP35-WT isolate (Figure 2B). Notably though, cross-linking of VP35-S129A  
393 resulted in a modest reduction in the formation of higher oligomeric forms compared to VP35-  
394 WT. This indicates that while decreased, VP35-S129A can still oligomerize.

395 Full length VP35 has been shown to form both trimers and tetramers in solution (Reid et al.,  
396 2005, Zinzula et al., 2009, Luthra et al., 2015, Bruhn et al., 2017, Ramaswamy et al., 2018), with  
397 the homo-tetrameric state being the dominant one among ebolavirus species (Zinzula et al.,  
398 2019b, Chanthamontri et al., 2019). Given that our VP35-S129A mutant displayed reduced  
399 capability to undergo oligomerization under cross-linking experiments, we next wanted to  
400 assess if the introduced mutation was affecting the quaternary structure of the oligomerization  
401 domain. To this aim, we performed size-exclusion chromatography coupled with multi-angle  
402 light scattering (SEC-MALS) on a truncated VP35 construct bordering the N-terminal coiled-coil  
403 (residues 75-185). WT and S129A VP35 oligomerization domains both eluted in one distinct  
404 peak with an average molecular mass of 51.8 and 51.6 kDa, respectively (Figure 2C).  
405 Corresponding to roughly 3.9 folds in stoichiometry compared to their monomeric molecular  
406 weight, these masses are consistent with the presence of a homo-tetramer in solution for both  
407 WT and S129A VP35. We then wondered if the defective oligomerization phenotype observed  
408 by the cross-linking immunoblot was due to any difference in stability between the homo-  
409 tetrameric oligomerization domain of the WT and the S129A mutant. To address this question,  
410 we performed thermal stability analysis by miniaturized differential scanning fluorimetry  
411 (nanoDSF). As shown by their thermal denaturation curves, WT and S129 VP35 oligomerization  
412 domains displayed melting temperature ( $T_m$ ) values of 72.1°C and 70.6°C, respectively (Figure  
413 2D). Although both these inflection points are reminiscent of a stable tertiary structure, the lower  
414  $T_m$  displayed by the S129A mutant suggests that a higher degree of flexibility exists at the level  
415 of the VP35 oligomerization domain.

416 Therefore, in order to assess if the S129A mutation could cause structural perturbations  
417 sufficient to locally affect the oligomerization domain folding, we tested it by circular dichroism  
418 (CD) spectroscopy. In agreement to what has been previously observed for the WT VP35  
419 oligomerization domain (Luthra et al., 2015; Zinzula et al., 2019), the CD spectra of the VP35  
420 S129A mutant was typical to that of a protein mainly consisting of  $\alpha$ -helices. Moreover, the  
421 value of the 222/208 nm ellipticity ratio was close to 1 for both proteins at all three temperature  
422 values tested (4°C, 23°C and 37°C), indicating that the coiled-coil motif - through which the  $\alpha$ -  
423 helices interact - remains in place in the S129A mutant. However, the difference in the ellipticity  
424 profile of S129A suggests that this mutation introduces some local conformational change  
425 (Figure 2E). Consistent with this hypothesis, deconvolution of CD spectra and analysis of the  
426 secondary structure content showed that the VP35 S129A oligomerization domain has a lower  
427  $\alpha$ -helical percentage with respect to WT at all temperature values tested, and that this content  
428 diminishes as temperature increases (Figure 2F). This result indicates that a more flexible and  
429 relaxed conformation is applied at the level of the VP35 coiled-coil superhelix upon the  
430 substitution of Ser-to-Ala at residue 129.

431 We further investigated the effect of S129A on VP35 oligomerization domain conformation by  
432 computational modeling. Starting from the available WT crystal structure, a Ser-to-Ala  
433 substitution was made and the oligomerization domain was subjected to energy minimization.  
434 The resulting structure was then compared to WT (Figure 3A and B). Conformation was  
435 unaffected but did cause a loss of hydrogen bonds between Ser129 and the neighboring Ala125  
436 (Figure 3C). The implicated biological effect may contribute to protein-protein interaction or  
437 modulatory phosphorylation (Figure 3D). Taken together, these data indicate that VP35-S129A  
438 has reduced capacity to oligomerize relative to VP35-WT and suggests a biological effect.

#### 439 *VP35-S129A retains IFN antagonist function*

440 To assess a role of Ser129 in VP35 function, we examined IFN antagonist function, including  
441 VP35 inhibition impact on the RIG-I-mediated signaling cascade and subsequent impairment of  
442 the interferon stimulated-gene (ISG) expression. Using a luciferase reporter gene assay, we first  
443 evaluated VP35-WT and VP35-S129A inhibition of dsRNA-induced RIG-I activation of the IFN- $\beta$   
444 promoter. HEK 293T cells were co-transfected with pGL-IFN- $\beta$ -luc, pRL-TK, and various  
445 dilutions of a vector control, VP35-WT, or VP35-S129A. Twenty-four h post-transfection, cells  
446 were stimulated with influenza A virus (IAV)-RNA. After 24 h, reporter activity was measured to  
447 assess IFN inhibition. IFN- $\beta$  promoter activation was significantly inhibited by both VP35-WT  
448 and VP35-S129A at comparable efficiencies (Figure 4A). Next, we tested the effect of VP35-WT  
449 and VP35-S129A on expression of ISGs upon stimulation by viral RNA or poly I:C. Using RT-  
450 qPCR, we analyzed gene expression of two well characterized ISGs, ISG15 and 2'-5'-  
451 oligoadenylate synthetase (OAS 2'-5'). Expression of these ISGs induced by stimulation with  
452 vRNA was significantly reduced by the presence of either VP35-WT or VP35-S129A, relative to  
453 the vector control. Specifically, ISG15 expression was inhibited 87% by VP35-WT and 90% by  
454 VP35-S129A, and OAS 2'-5' expression was inhibited 87% by VP35-WT and 95% by VP35-  
455 S129A (Figure 4B). Further, the effect of poly I:C stimulation on ISG56 protein expression was  
456 assessed by immunoblot. HeLa cells were transfected with vector control, VP35-WT, or VP35-  
457 S129A. Twenty-four h post-transfection cells were left unstimulated or stimulated with poly I:C.

458 Both VP35-WT and VP35-S129A were able to inhibit ISG56 protein expression, with levels  
459 comparable to that of the non-stimulated vector control (Figure 4C). Collectively, the data show  
460 that VP35-S129A retains IFN antagonist activity, indicating that VP35 Ser129 does not impact  
461 IFN antagonist function.

#### 462 *VP35-S129A abrogates EBOV minigenome activity and interaction with L<sub>1-505</sub>*

463 Since VP35 is an essential polymerase cofactor, we next evaluated the effect of VP35-S129A  
464 on EBOV minigenome activity. Plasmids encoding EBOV minigenome assay components NP,  
465 L, VP35, VP30 and the 3E5E-luciferase minigenome, along with *Renilla* luciferase to control for  
466 transfection efficiency variability, were co-transfected in HeLa cells. Forty-eight h post-  
467 transfection, a dual-luciferase assay was used to measure reporter activity. Notably, the  
468 presence of VP35-S129A nearly abolished minigenome activity relative to VP35-WT, with  
469 activity level close to that of the no L control (Figure 5A). Additionally, representative lysates  
470 from the minigenome assay were subjected to immunoblotting to confirm appropriate  
471 expression of the WT and mutant (Figure 5B). While both VP35-WT and VP35-S129A  
472 predominantly expressed one major species of the same migration (~38 kD), other bands were  
473 observed. Specifically, VP35-WT contained modest upper bands at ~45 kD and ~85 kD),  
474 whereas VP35-S129A contained a modest lower band at ~35 kD. This may be representative of  
475 differential PTMs between VP35-WT and VP35-S129A, such as differing phosphorylation  
476 states. Overall, these data suggest that Ser129 impacts VP35 transcription and replication  
477 function.

478 To further investigate the role of Ser129 on VP35 replication function, we next examined  
479 whether VP35-S129A retains the ability to interact with NP and L by co-IP experiments. HeLa  
480 cells were transfected with FLAG-VP35-WT or HIS-VP35-S129A in the absence or presence of  
481 either HA-NP or HA-L<sub>1-505</sub>. The previously described HA-L<sub>1-505</sub> truncation mutant includes the  
482 VP35 interaction site and was used due to protein detection issues of full length L (Shabman et  
483 al., 2013, Trunschke et al., 2013). Vector control was included in transfections with VP35-WT or  
484 VP35-S129A alone to keep total DNA amounts constant. After 24 h, proteins were harvested  
485 and applied to IP using HA-tagged beads. After IP, WCLs and IP samples were subjected to  
486 SDS-PAGE and products were analyzed by immunoblot. Both VP35-WT and VP35-S129A were  
487 pulled down only in the presence of HA-NP, demonstrating specificity of interaction and  
488 indicating that VP35-S129A retains the ability to interact with NP (Figure 5C). Notably, VP35-  
489 WT was pulled down with HA-L<sub>1-505</sub> whereas VP35-S129A was not, indicating that the  
490 substitution of Ser129 to Ala results in the loss VP35-L interaction (Figure 5D). Collectively,  
491 these data show that Ser-to-Ala substitution at residue 129 of VP35 abolishes minigenome  
492 activity through loss of interaction between VP35-S129A and L but does not affect IFN  
493 antagonist function, effectively uncoupling IFN antagonist and replication functions. This is the  
494 first report to suggest phosphorylation contributes a regulatory role in VP35 function and  
495 presents a potential therapeutic target.

## 496 **Discussion**

497 The most highly phosphorylated protein of NNSVs is generally the P protein, with  
498 phosphorylation universally regarded as important to P protein function. While phosphorylation

499 has been shown to modulate the function of several NNSVs including VSV, RSV, CHPV, BDV,  
500 RABV, RPV, MV, MuV, and NDV, evidence to support this is lacking for filoviruses  
501 (Chattopadhyay and Banerjee, 1987, Barik and Banerjee, 1991, Barik and Banerjee, 1992a,  
502 Barik and Banerjee, 1992b, Gao and Lenard, 1995, Gao et al., 1996, Pattnaik et al., 1997, Das  
503 and Pattnaik, 2004, Barik et al., 1995, Asenjo and Villanueva, 2000, Villanueva et al., 2000,  
504 Asenjo et al., 2006, Asenjo et al., 2008, Asenjo and Villanueva, 2016, Chattopadhyay et al.,  
505 1997, Raha et al., 1999, Raha et al., 2000, Schmid et al., 2007, Timani et al., 2008, Moseley et  
506 al., 2007, Saikia et al., 2008, Sugai et al., 2012, Pickar et al., 2014, Qiu et al., 2016). The  
507 combination of cell-biological, biochemical, and computational studies described here suggests  
508 that phosphorylation plays a modulatory role in EBOV VP35 function, thus supporting  
509 phosphorylation of the EBOV P protein as functionally significant. Specifically, we identify a  
510 highly conserved Ser129 as a key regulatory residue, showing by Ala substitution that Ser129 is  
511 important for VP35 replication function, but not IFN antagonist function. NanoDSF results  
512 indicate that the S129A mutant possesses a higher degree of flexibility at the level of the VP35  
513 oligomerization domain, with secondary structure content analysis indicating that a more flexible  
514 and relaxed conformation is applied at the level of the VP35 coiled-coil superhelix. We further  
515 show that while interactions with VP35-WT and NP remain intact, VP35-S129A exhibits  
516 impaired ability to interact with the viral polymerase.

517 VP35, along with L, NP, and VP30, is an essential component of the filovirus replication  
518 machinery, functioning as a non-enzymatic cofactor of the viral polymerase (Muhlberger et al.,  
519 1998, Muhlberger et al., 1999, Boehmann et al., 2005, Prins et al., 2010). It is generally  
520 accepted that VP35 acts as a bridge between L and NP, thereby serving to mediate L  
521 interaction with NP-encapsidated template RNAs. Both VP35-L and VP35-NP interactions are  
522 thus likely to be essential for viral RNA synthesis (Becker et al., 1998, DiCarlo et al., 2007,  
523 Trunschke et al., 2013, Kirchdoerfer et al., 2015, Leung et al., 2015). It has been shown that  
524 VSV P protein must undergo phosphorylation-dependent homo-oligomerization to become  
525 transcriptionally active (Gao and Lenard, 1995). Consistent with these findings are the nanoDSF  
526 results in this study which indicate that the VP35-S129A mutant possesses a higher degree of  
527 flexibility at the level of the VP35 oligomerization domain, and severely decreases EBOV  
528 minigenome activity. In addition, the oligomerization domain of MuV and hPIV3 P proteins has  
529 been shown to have an enhancing effect on the P-L interaction, which further supports the  
530 findings here (Choudhary et al., 2002, Pickar et al., 2015).

531 VP35 has been shown to be phosphorylated by IKK $\epsilon$  and TBK-1 in vitro, which suggests the  
532 possibility that its function may be modulated by these kinases (Prins et al., 2009). In this case  
533 VP35 exerts IFN-antagonist function by preventing TBK-1 and/or IKK $\epsilon$  from activating  
534 IRF3/IRF7. It has yet to be determined whether VP35 becomes phosphorylated in EBOV-  
535 infected cells, though, and whether that modulates its function. The extent to which VP35 is  
536 phosphorylated by these kinases in EBOV-infected cells would be influenced by the extent to  
537 which VP35 acts as a decoy substrate for IKK $\epsilon$  and TBK-1 relative to the extent VP35 merely  
538 prevents kinase activation via steric inhibition (Prins et al., 2009). Even so, in our study here the  
539 VP35-S129A mutant impaired replication function but did not affect VP35 IFN antagonist  
540 function. Given the high virulence of EBOV infection and the multifunctional nature of VP35, it  
541 seems unlikely that VP35 phosphorylation by IKK $\epsilon$  and TBK-1 would detrimentally affect virus

542 replication. Considering then that the IFN antagonism of the VP35-S129A mutant remained  
543 intact instead suggests that another host kinase(s) would be involved in the potential  
544 phosphorylation of Ser129.

545 Previous studies have demonstrated phosphorylation of NP and VP30; moreover, a functional  
546 significance for VP30 phosphorylation has been described (Elliott et al., 1985, Becker et al.,  
547 1994, Modrof et al., 2002, Martinez et al., 2008, Biedenkopf et al., 2016). The data here suggest  
548 that phosphorylation of VP35 does play a modulatory role, which aligns with the homologous  
549 functions of NNSV P proteins. Even so, the MS analysis herein was limited to predicting  
550 phosphorylation of Ser129, rather than definitively identifying the residue as phosphorylated,  
551 thus future studies will need to provide such evidence. Given that other P proteins, such as VSV  
552 and RSV, have been dramatically affected by single Ser-to-Ala substitutions lends more  
553 credence to phosphorylation of VP35 Ser129 exerting a modulatory role, as opposed to other  
554 PTMs (Chattopadhyay and Banerjee, 1987, Asenjo and Villanueva, 2000). However, other  
555 modifications of Ser are known to occur, including O-linked glycosylation and acetylation (Wang  
556 et al., 2015). Future studies must confirm relevance during EBOV infection as well as determine  
557 whether Ser129 is post-translationally modified, and, if so, whether the PTM is constitutive or  
558 dynamic.

559 EBOV, SUDV, and BDBV infections cause severe disease in humans with high case fatality  
560 rates (Feldmann et al., 2013). While there are promising vaccine and therapeutic candidates,  
561 there remains an urgent need to develop effective therapeutics against ebolaviruses (Haque et  
562 al., 2015, Espeland et al., 2018, Dhama et al., 2018). Development of drugs that interfere with  
563 VP35 homo-oligomerization are likely to impair viral gene expression, therefore identification of  
564 a potential target is an asset for the design of novel antiviral agents. Because Ser129 is well  
565 conserved across ebolaviruses, inhibition of its modulatory role presents a potential pan-filoviral  
566 therapeutic strategy.

567 In recent years, novel VP35 activities beyond IFN antagonist, polymerase cofactor, and  
568 nucleocapsid component have been discovered, including repression of stress granules and  
569 NTPase and helicase-like activities (Le Sage et al., 2017, Shu et al., 2019). Though these  
570 studies have provided more insight into VP35 biology, the regulation of these activities is  
571 underexplored, particularly regarding the homology of VP35 as a P protein. Here, our data  
572 indicate that the Ser129 residue is important for VP35 polymerase cofactor function but not for  
573 IFN antagonist function, which effectively uncouples the major function of VP35. Biochemical  
574 characterization indicated that VP35-S129A has reduced capacity to oligomerize, and colPs  
575 showed that the interaction between VP35 and L1-505 was abolished upon Ala substitution at  
576 residue 129. Future studies will address host kinases and incorporate viral infections to shed  
577 light on how VP35 function is modulated.

578 **Funding:** This work was supported by startup funds for S.P.R.

579 **Acknowledgments:** We thank Janice A. Taylor and James R. Talaska of the Advanced  
580 Microscopy Core Facility at the University of Nebraska Medical Center for providing assistance  
581 with confocal microscopy. The University of Nebraska Medical Center Advanced Microscopy  
582 Core Facility receives partial support from the National Institute for General Medical Science

583 (NIGMS) INBRE - P20 GM103427 and COBRE - P30 GM106397 grants, as well as support  
584 from the National Cancer Institute (NCI) for The Fred & Pamela Buffett Cancer Center Support  
585 Grant- P30 CA036727, and the Nebraska Research Initiative. This publication's contents and  
586 interpretations are the sole responsibility of the authors.

587 **Conflicts of Interest:** The authors declare no conflict of interest

## 588 **References**

- 589 2018. Maestro, Schrödinger. *Schrödinger, LLC, New York, NY.*
- 590 ASENJO, A., CALVO, E. & VILLANUEVA, N. 2006. Phosphorylation of human respiratory syncytial virus P  
591 protein at threonine 108 controls its interaction with the M2-1 protein in the viral RNA  
592 polymerase complex. *J Gen Virol*, 87, 3637-42.
- 593 ASENJO, A., GONZALEZ-ARMAS, J. C. & VILLANUEVA, N. 2008. Phosphorylation of human respiratory  
594 syncytial virus P protein at serine 54 regulates viral uncoating. *Virology*, 380, 26-33.
- 595 ASENJO, A. & VILLANUEVA, N. 2000. Regulated but not constitutive human respiratory syncytial virus  
596 (HRSV) P protein phosphorylation is essential for oligomerization. *Federation of European*  
597 *Biochemical Societies*, 467.
- 598 ASENJO, A. & VILLANUEVA, N. 2016. Phosphorylation of the human respiratory syncytial virus P protein  
599 mediates M2-2 regulation of viral RNA synthesis, a process that involves two P proteins. *Virus*  
600 *Res*, 211, 117-25.
- 601 BALE, S., JULIEN, J. P., BORNHOLDT, Z. A., KIMBERLIN, C. R., HALFMANN, P., ZANDONATTI, M. A.,  
602 KUNERT, J., KROON, G. J., KAWAOKA, Y., MACRAE, I. J., WILSON, I. A. & SAPHIRE, E. O. 2012.  
603 Marburg virus VP35 can both fully coat the backbone and cap the ends of dsRNA for interferon  
604 antagonism. *PLoS Pathog*, 8, e1002916.
- 605 BALE, S., JULIEN, J. P., BORNHOLDT, Z. A., KROIS, A. S., WILSON, I. A. & SAPHIRE, E. O. 2013. Ebola virus  
606 VP35 coats the backbone of double-stranded RNA for interferon antagonism. *J Virol*, 87, 10385-  
607 8.
- 608 BANADYGA, L., HOENEN, T., AMBROGGIO, X., DUNHAM, E., GROSETH, A. & EBIHARA, H. 2017. Ebola  
609 virus VP24 interacts with NP to facilitate nucleocapsid assembly and genome packaging. *Sci Rep*,  
610 7, 7698.
- 611 BARIK, S. & BANERJEE, A. K. 1991. Cloning and Expression of the Vesicular Stomatitis Virus  
612 Phosphoprotein Gene in *Escherichia coli*: Analysis of Phosphorylation Status versus  
613 Transcriptional Activity. *Journal of Virology*, 65, 1719-1726.
- 614 BARIK, S. & BANERJEE, A. K. 1992a. Phosphorylation by cellular casein kinase II is essential for  
615 transcriptional activity of vesicular stomatitis virus phosphoprotein P. *Proc. Natl. Acad. Sci. USA*,  
616 89, 6570-6574.
- 617 BARIK, S. & BANERJEE, A. K. 1992b. Sequential Phosphorylation of the Phosphoprotein of Vesicular  
618 Stomatitis Virus by Cellular and Viral Protein Kinases Is Essential for Transcription Activation.  
619 *Journal of Virology*, 66, 1109-1118.
- 620 BARIK, S., MCLEAN, T. & DUPUY, L. C. 1995. Phosphorylation of Ser232 Directly Regulates the  
621 Transcriptional Activity of the P Protein of Human Respiratory Syncytial Virus: Phosphorylation  
622 of Ser237 May Play an Accessory Role. *Virology*, 213, 405-412.
- 623 BASLER, C. F., MIKULASOVA, A., MARTINEZ-SOBRIDO, L., PARAGAS, J., MUHLBERGER, E., BRAY, M.,  
624 KLENK, H. D., PALESE, P. & GARCIA-SASTRE, A. 2003. The Ebola virus VP35 protein inhibits  
625 activation of interferon regulatory factor 3. *J Virol*, 77, 7945-56.
- 626 BASLER, C. F., X, W., E, M., VOLCHKOV, V. E., J, P., H.D., K., A., G.-S. & P., P. 2000. The Ebola virus VP35  
627 protein functions as a type I IFN antagonist. *Proc Natl Acad Sci U S A*, 97, 12289-12294.



- 628 BECKER, S., HUPPERTZ, S., KLENK, H. D. & FELDMANN, H. 1994. The nucleoprotein of Marburg virus is  
629 phosphorylated. *Journal of General Virology*, 75, 809-818.
- 630 BECKER, S., RINNE, C., HOFSAß, U., KLENK, H.-D. & MUHLBERGER, E. 1998. Interactions of Marburg  
631 Virus Nucleocapsid Proteins *Virology*, 249, 406-417.
- 632 BERMAN, H. M., WESTBROOK, J., FENG, Z., GILLILAND, G., BHAT, T. N., WEISSIG, H., SHINDYALOV, I. N. &  
633 BOURNE, P. E. 2000. The Protein Data Bank. *Nucleic Acids Res*, 28, 235-42.
- 634 BHARAJ, P., ATKINS, C., LUTHRA, P., GIRALDO, M. I., DAWES, B. E., MIORIN, L., JOHNSON, J. R., KROGAN,  
635 N. J., BASLER, C. F., FREIBERG, A. N. & RAJSBAUM, R. 2017. The Host E3-Ubiquitin Ligase TRIM6  
636 Ubiquitinates the Ebola Virus VP35 Protein and Promotes Virus Replication. *J Virol*, 91.
- 637 BIEDENKOPF, N., LIER, C. & BECKER, S. 2016. Dynamic Phosphorylation of VP30 Is Essential for Ebola  
638 Virus Life Cycle. *J Virol*, 90, 4914-4925.
- 639 BOEHMANN, Y., ENTERLEIN, S., RANDOLF, A. & MUHLBERGER, E. 2005. A reconstituted replication and  
640 transcription system for Ebola virus Reston and comparison with Ebola virus Zaire. *Virology*, 332,  
641 406-17.
- 642 BRUHN, J. F., KIRCHDOERFER, R. N., URATA, S. M., LI, S., TICKLE, I. J., BRICOGNE, G. & SAPHIRE, E. O.  
643 2017. Crystal Structure of the Marburg Virus VP35 Oligomerization Domain. *J Virol*, 91.
- 644 CANNAS, V., DAINO, G. L., CORONA, A., ESPOSITO, F. & TRAMONTANO, E. 2015. A Luciferase Reporter  
645 Gene Assay to Measure Ebola Virus Viral Protein 35-Associated Inhibition of Double-Stranded  
646 RNA-Stimulated, Retinoic Acid-Inducible Gene 1-Mediated Induction of Interferon beta. *J Infect*  
647 *Dis*, 212 Suppl 2, S277-81.
- 648 CARDENAS, W. B., LOO, Y. M., GALE, M., JR., HARTMAN, A. L., KIMBERLIN, C. R., MARTINEZ-SOBRIDO, L.,  
649 SAPHIRE, E. O. & BASLER, C. F. 2006. Ebola virus VP35 protein binds double-stranded RNA and  
650 inhibits alpha/beta interferon production induced by RIG-I signaling. *J Virol*, 80, 5168-78.
- 651 CDC. 2018. *Years of Ebola Virus Disease Outbreaks* [Online]. Available:  
652 <https://www.cdc.gov/vhf/ebola/history/chronology.html> [Accessed July 17 2018 2018].
- 653 CHANG, T. H., KUBOTA, T., MATSUOKA, M., JONES, S., BRADFUTE, S. B., BRAY, M. & OZATO, K. 2009.  
654 Ebola Zaire virus blocks type I interferon production by exploiting the host SUMO modification  
655 machinery. *PLoS Pathog*, 5, e1000493.
- 656 CHANTHAMONTRI, C. K., JORDAN, D. S., WANG, W., WU, C., LIN, Y., BRETT, T. J., GROSS, M. L. & LEUNG,  
657 D. W. 2019. The Ebola Viral Protein 35 N-Terminus Is a Parallel Tetramer. *Biochemistry*, 58, 657-  
658 664.
- 659 CHATTOPADHYAY, D. & BANERJEE, A. K. 1987. Phosphorylation within a Specific Domain of the  
660 Phosphoprotein of Vesicular Stomatitis Virus Regulates Transcription In Vitro. *Cell*, 49, 407-414.
- 661 CHATTOPADHYAY, D., RAHA, T. & CHATTOPADHYAY, D. 1997. Single Serine Phosphorylation within the  
662 Acidic Domain of Chandipura Virus P Protein Regulates the Transcription in Vitro. *Virology*, 239,  
663 11-19.
- 664 CHOUDHARY, S. K., MALUR, A. G., HUO, Y., DE, B. P. & BANERJEE, A. K. 2002. Characterization of the  
665 oligomerization domain of the phosphoprotein of human parainfluenza virus type 3. *Virology*,  
666 302, 373-82.
- 667 CROSS, R. W., MIRE, C. E., FELDMANN, H. & GEISBERT, T. W. 2018. Post-exposure treatments for Ebola  
668 and Marburg virus infections. *Nat Rev Drug Discov*, 17, 413-434.
- 669 DAS, S. C. & PATTNAIK, A. K. 2004. Phosphorylation of vesicular stomatitis virus phosphoprotein P is  
670 indispensable for virus growth. *J Virol*, 78, 6420-30.
- 671 DHAMA, K., KARTHIK, K., KHANDIA, R., CHAKRABORTY, S., MUNJAL, A., LATHEEF, S. K., KUMAR, D.,  
672 RAMAKRISHNAN, M. A., MALIK, Y. S., SINGH, R., MALIK, S. V. S., SINGH, R. K. & CHAICUMPA, W.  
673 2018. Advances in Designing and Developing Vaccines, Drugs, and Therapies to Counter Ebola  
674 Virus. *Front Immunol*, 9, 1803.

- 675 DICARLO, A., MOLLER, P., LANDER, A., KOLESNIKOVA, L. & BECKER, S. 2007. Nucleocapsid formation and  
676 RNA synthesis of Marburg virus is dependent on two coiled coil motifs in the nucleoprotein.  
677 *Virology*, 4, 105.
- 678 DILLEY, K. A., VOORHIES, A. A., LUTHRA, P., PURI, V., STOCKWELL, T. B., LORENZI, H., BASLER, C. F. &  
679 SHABMAN, R. S. 2017. The Ebola virus VP35 protein binds viral immunostimulatory and host  
680 RNAs identified through deep sequencing. *PLoS One*, 12, e0178717.
- 681 ELLIOTT, L. H., KILEY, M. P. & MCCORMICK, J. B. 1985. Descriptive analysis of Ebola virus proteins.  
682 *Virology*, 147, 169-176.
- 683 ESPELAND, E. M., TSAI, C. W., LARSEN, J. & DISBROW, G. L. 2018. Safeguarding against Ebola: Vaccines  
684 and therapeutics to be stockpiled for future outbreaks. *PLoS Negl Trop Dis*, 12, e0006275.
- 685 FABOZZI, G., NABEL, C. S., DOLAN, M. A. & SULLIVAN, N. J. 2011. Ebolavirus proteins suppress the effects  
686 of small interfering RNA by direct interaction with the mammalian RNA interference pathway. *J*  
687 *Virology*, 85, 2512-23.
- 688 FANUNZA, E., FRAU, A., CORONA, A. & TRAMONTANO, E. 2018a. Chapter Four - Antiviral Agents Against  
689 Ebola Virus Infection: Repositioning Old Drugs and Finding Novel Small Molecules. *Annual*  
690 *Reports in Medicinal Chemistry*, 51, 135-173.
- 691 FANUNZA, E., FRAU, A., CORONA, A. & TRAMONTANO, E. 2018b. Insights into Ebola Virus VP35 and VP24  
692 Interferon inhibitory functions and their initial exploitation as drug targets. *Infectious Disorders*  
693 *Drug Targets*, 1969.
- 694 FELDMANN, H., SANCHEZ, A. & GEISBERT, T. 2013. Filoviridae: Marburg and Ebola Viruses. In: DAVID M.  
695 KNIPE, P. M. H. (ed.) *Fields Virology*. 6th ed. Philadelphia, PA, USA: Lippincott Williams & Wilkins.
- 696 FENG, Z., CERVENY, M., YAN, Z. & HE, B. 2007. The VP35 protein of Ebola virus inhibits the antiviral effect  
697 mediated by double-stranded RNA-dependent protein kinase PKR. *J Virol*, 81, 182-92.
- 698 GAO, Y., GREENFIELD, N. J., CLEVERLEY, D. Z. & LENARD, J. 1996. The Transcriptional Form of the  
699 Phosphoprotein of Vesicular Stomatitis Virus Is a Trimer: Structure and Stability. *Biochemistry*,  
700 35, 14569-14573.
- 701 GAO, Y. & LENARD, J. 1995. Cooperative Binding of Multimeric Phosphoprotein (P) of Vesicular  
702 Stomatitis Virus to Polymerase (L) and Template: Pathways of Assembly. *Journal of Virology*, 69,  
703 7718-7723.
- 704 GOLDSTEIN, T., ANTHONY, S. J., GBAKIMA, A., BIRD, B. H., BANGURA, J., TREMEAU-BRAVARD, A.,  
705 BELAGANAHALLI, M. N., WELLS, H. L., DHANOTA, J. K., LIANG, E., GRODUS, M., JANGRA, R. K.,  
706 DEJESUS, V. A., LASSO, G., SMITH, B. R., JAMBAL, A., KAMARA, B. O., KAMARA, S., BANGURA, W.,  
707 MONAGIN, C., SHAPIRA, S., JOHNSON, C. K., SAYLORS, K., RUBIN, E. M., CHANDRAN, K., LIPKIN,  
708 W. I. & MAZET, J. A. K. 2018. The discovery of Bombali virus adds further support for bats as  
709 hosts of ebolaviruses. *Nat Microbiol*, 3, 1084-1089.
- 710 HAASNOOT, J., DE VRIES, W., GEUTJES, E. J., PRINS, M., DE HAAN, P. & BERKHOUT, B. 2007. The Ebola  
711 virus VP35 protein is a suppressor of RNA silencing. *PLoS Pathog*, 3, e86.
- 712 HAQUE, A., HOBER, D. & BLONDIAUX, J. 2015. Addressing Therapeutic Options for Ebola Virus Infection  
713 in Current and Future Outbreaks. *Antimicrob Agents Chemother*, 59, 5892-902.
- 714 HARTMAN, A. L., BIRD, B. H., TOWNER, J. S., ANTONIADOU, Z. A., ZAKI, S. R. & NICHOL, S. T. 2008.  
715 Inhibition of IRF-3 activation by VP35 is critical for the high level of virulence of ebola virus. *J*  
716 *Virology*, 82, 2699-704.
- 717 HUANG, Y., XU, L., SUN, Y. & NABEL, G. J. 2002. The Assembly of Ebola Virus Nucleocapsid Requires  
718 Virion-Associated Proteins 35 and 24 and Posttranslational Modification of Nucleoprotein.  
719 *Molecular Cell*, 10, 307-316.
- 720 KAMINSKI, G. A., FRIESNER, R. A., TIRADO-RIVES, J. & JORGENSEN, W. L. 2001. Evaluation and  
721 Reparametrization of the OPLS-AA Force Field for Proteins via Comparison with Accurate

- 722 Quantum Chemical Calculations on Peptides. *The Journal of Physical Chemistry B*, 105, 6474-  
723 6487.
- 724 KESHWARA, R., JOHNSON, R. F. & SCHNELL, M. J. 2017. Toward an Effective Ebola Virus Vaccine. *Annu*  
725 *Rev Med*, 68, 371-386.
- 726 KIMBERLIN, C. R., BORNHOLDT, Z. A., LI, S., WOODS, V. L., JR., MACRAE, I. J. & SAPHIRE, E. O. 2010.  
727 Ebola virus VP35 uses a bimodal strategy to bind dsRNA for innate immune suppression. *Proc*  
728 *Natl Acad Sci U S A*, 107, 314-9.
- 729 KIRCHDOERFER, R. N., ABELSON, D. M., LI, S., WOOD, M. R. & SAPHIRE, E. O. 2015. Assembly of the Ebola  
730 Virus Nucleoprotein from a Chaperoned VP35 Complex. *Cell Rep*, 12, 140-149.
- 731 KUHN, J. H. 2017. Guide to the Correct Use of Filoviral Nomenclature. In: MÜHLBERGER, E., HENSLEY, L.  
732 L. & TOWNER, J. S. (eds.) *Marburg- and Ebolaviruses: From Ecosystems to Molecules*. Cham:  
733 Springer International Publishing.
- 734 LE SAGE, V., CINTI, A., MCCARTHY, S., AMORIM, R., RAO, S., DAINO, G. L., TRAMONTANO, E., BRANCH, D.  
735 R. & MOULAND, A. J. 2017. Ebola virus VP35 blocks stress granule assembly. *Virology*, 502, 73-  
736 83.
- 737 LEUNG, D. W., BOREK, D., FARAHBAKHS, M., RAMANAN, P., NIX, J. C., WANG, T., PRINS, K. C.,  
738 OTWINOWSKI, Z., HONZATKO, R. B., HELGESON, L. A., BASLER, C. F. & AMARASINGHE, G. K.  
739 2010a. Crystallization and preliminary X-ray analysis of Ebola VP35 interferon inhibitory domain  
740 mutant proteins. *Acta Crystallogr Sect F Struct Biol Cryst Commun*, 66, 689-92.
- 741 LEUNG, D. W., BOREK, D., LUTHRA, P., BINNING, J. M., ANANTPADMA, M., LIU, G., HARVEY, I. B., SU, Z.,  
742 ENDLICH-FRAZIER, A., PAN, J., SHABMAN, R. S., CHIU, W., DAVEY, R. A., OTWINOWSKI, Z.,  
743 BASLER, C. F. & AMARASINGHE, G. K. 2015. An Intrinsically Disordered Peptide from Ebola Virus  
744 VP35 Controls Viral RNA Synthesis by Modulating Nucleoprotein-RNA Interactions. *Cell Rep*, 11,  
745 376-89.
- 746 LEUNG, D. W., GINDER, N. D., FULTON, D. B., NIX, J., BASLER, C. F., HONZATKO, R. B. & AMARASINGHE,  
747 G. K. 2009a. Structure of the Ebola VP35 interferon inhibitory domain. *Proc Natl Acad Sci U S A*,  
748 106, 411-416.
- 749 LEUNG, D. W., GINDER, N. D., NIX, J. C., BASLER, C. F., HONZATKO, R. B. & AMARASINGHE, G. K. 2009b.  
750 Expression, purification, crystallization and preliminary X-ray studies of the Ebola VP35  
751 interferon inhibitory domain. *Acta Crystallogr Sect F Struct Biol Cryst Commun*, 65, 163-5.
- 752 LEUNG, D. W., PRINS, K. C., BASLER, C. F. & AMARASINGHE, G. K. 2010b. Ebola virus VP35 is a  
753 multifunctional virulence factor. *Virulence*, 1, 526-31.
- 754 LEUNG, D. W., PRINS, K. C., BOREK, D. M., FARAHBAKHS, M., TUFARIELLO, J. M., RAMANAN, P., NIX, J.  
755 C., HELGESON, L. A., OTWINOWSKI, Z., HONZATKO, R. B., BASLER, C. F. & AMARASINGHE, G. K.  
756 2010c. Structural basis for dsRNA recognition and interferon antagonism by Ebola VP35. *Nat*  
757 *Struct Mol Biol*, 17, 165-72.
- 758 LEUNG, D. W., SHABMAN, R. S., FARAHBAKHS, M., PRINS, K. C., BOREK, D. M., WANG, T.,  
759 MUHLBERGER, E., BASLER, C. F. & AMARASINGHE, G. K. 2010d. Structural and functional  
760 characterization of Reston Ebola virus VP35 interferon inhibitory domain. *J Mol Biol*, 399, 347-  
761 57.
- 762 LUTHRA, P., JORDAN, D. S., LEUNG, D. W., AMARASINGHE, G. K. & BASLER, C. F. 2015. Ebola virus VP35  
763 interaction with dynein LC8 regulates viral RNA synthesis. *J Virol*, 89, 5148-53.
- 764 LUTHRA, P., RAMANAN, P., MIRE, C. E., WEISEND, C., TSUDA, Y., YEN, B., LIU, G., LEUNG, D. W.,  
765 GEISBERT, T. W., EBIHARA, H., AMARASINGHE, G. K. & BASLER, C. F. 2013. Mutual antagonism  
766 between the Ebola virus VP35 protein and the RIG-I activator PACT determines infection  
767 outcome. *Cell Host Microbe*, 14, 74-84.

- 768 MARTINEZ, M. J., BIEDENKOPF, N., VOLCHKOVA, V., HARTLIEB, B., ALAZARD-DANY, N., BECKER, S. &  
769 VOLCHKOV, V. E. 2008. Role of Ebola virus VP30 in transcription reinitiation. *J Virol*, 82, 12569-  
770 73.
- 771 MESSAOUDI, I., AMARASINGHE, G. K. & BASLER, C. F. 2015. Filovirus pathogenesis and immune evasion:  
772 insights from Ebola virus and Marburg virus. *Nat Rev Microbiol*, 13, 663-76.
- 773 MODROF, J., MUHLBERGER, E., KLENK, H. D. & BECKER, S. 2002. Phosphorylation of VP30 impairs ebola  
774 virus transcription. *J Biol Chem*, 277, 33099-104.
- 775 MOLLER, P., PARIENTE, N., KLENK, H. D. & BECKER, S. 2005. Homo-oligomerization of Marburgvirus VP35  
776 is essential for its function in replication and transcription. *J Virol*, 79, 14876-86.
- 777 MOSELEY, G. W., FILMER, R. P., DEJESUS, M. A. & JANS, D. A. 2007. Nucleocytoplasmic Distribution of  
778 Rabies Virus P-Protein Is Regulated by Phosphorylation Adjacent to C-Terminal Nuclear Import  
779 and Export Signals. *Biochemistry*, 46, 12053-12061.
- 780 MUHLBERGER, E., B., L., KLENK, H.-D. & BECKER, S. 1998. Three of the Four Nucleocapsid Proteins of  
781 Marburg Virus, NP, VP35, and L, Are Sufficient To Mediate Replication and Transcription of  
782 Marburg Virus-Specific Monocistronic Minigenomes. *J Virol*, 72, 8756-8764.
- 783 MUHLBERGER, E., M., W., V.E., V., H., K. & S., B. 1999. Comparison of the Transcription and Replication  
784 Strategies of MARV and EBOV 1999. *J Virol*, 73, 2333-2342.
- 785 NELSON, E. V., PACHECO, J. R., HUME, A. J., CRESSEY, T. N., DEFLUBE, L. R., RUEDAS, J. B., CONNOR, J. H.,  
786 EBIHARA, H. & MUHLBERGER, E. 2017. An RNA polymerase II-driven Ebola virus minigenome  
787 system as an advanced tool for antiviral drug screening. *Antiviral Res*, 146, 21-27.
- 788 NODA, T., KOLESNIKOVA, L., BECKER, S. & KAWAOKA, Y. 2011. The Importance of the NP: VP35 Ratio in  
789 Ebola Virus Nucleocapsid Formation. *Journal of Infectious Diseases*, S878-83.
- 790 PATTHAIK, A. K. H., L., LI, T., ENGLUND, N., MATHUR, M., DAS, T. & BANERJEE, A. K. 1997.  
791 Phosphorylation within the Amino-Terminal Acidic Domain I of the Phosphoprotein of Vesicular  
792 Stomatitis Virus Is Required for Transcription but Not for Replication. *Journal of Virology*, 71,  
793 8167-8175.
- 794 PICKAR, A., ELSON, A., YANG, Y., XU, P., LUO, M. & HE, B. 2015. Oligomerization of Mumps Virus  
795 Phosphoprotein. *J Virol*, 89, 11002-10.
- 796 PICKAR, A., XU, P., ELSON, A., LI, Z., ZENGEL, J. & HE, B. 2014. Roles of serine and threonine residues of  
797 mumps virus P protein in viral transcription and replication. *J Virol*, 88, 4414-22.
- 798 PRINS, K. C., BINNING, J. M., SHABMAN, R. S., LEUNG, D. W., AMARASINGHE, G. K. & BASLER, C. F. 2010.  
799 Basic residues within the ebolavirus VP35 protein are required for its viral polymerase cofactor  
800 function. *J Virol*, 84, 10581-91.
- 801 PRINS, K. C., CARDENAS, W. B. & BASLER, C. F. 2009. Ebola virus protein VP35 impairs the function of  
802 interferon regulatory factor-activating kinases IKKepsilon and TBK-1. *J Virol*, 83, 3069-77.
- 803 QIU, X., ZHAN, Y., MENG, C., WANG, J., DONG, L., SUN, Y., TAN, L., SONG, C., YU, S. & DING, C. 2016.  
804 Identification and functional analysis of phosphorylation in Newcastle disease virus  
805 phosphoprotein. *Arch Virol*, 161, 2103-16.
- 806 RAHA, T., CHATTOPADHYAY, D., CHATTOPADHYAY, D. J. & ROY, S. 1999. A Phosphorylation-Induced  
807 Major Structural Change in the N-Terminal Domain of the P Protein of Chandipura Virus.  
808 *Biochemistry*, 38, 2110-2116.
- 809 RAHA, T., SAMAL, E., MAJUMDAR, A., BASAK, S., CHATTOPADHYAY, D. & CHATTOPADHYAY, D. J. 2000. N-  
810 terminal region of P protein of Chandipura virus is responsible for phosphorylation-mediated  
811 homodimerization. *Protein Engineering*, 13, 437-444.
- 812 RAMANAN, P., EDWARDS, M. R., SHABMAN, R. S., LEUNG, D. W., ENDLICH-FRAZIER, A. C., BOREK, D. M.,  
813 OTWINOWSKI, Z., LIU, G., HUH, J., BASLER, C. F. & AMARASINGHE, G. K. 2012. Structural basis  
814 for Marburg virus VP35-mediated immune evasion mechanisms. *Proc Natl Acad Sci U S A*, 109,  
815 20661-6.

- 816 RAMASWAMY, V. K., DI PALMA, F., VARGIU, A. V., CORONA, A., PIANO, D., RUGGERONE, P., ZINZULA, L.  
817 & TRAMONTANO, E. 2018. Insights into the homo-oligomerization properties of N-terminal  
818 coiled-coil domain of Ebola virus VP35 protein. *Virus Res*, 247, 61-70.
- 819 REID, S. P., CARDENAS, W. B. & BASLER, C. F. 2005. Homo-oligomerization facilitates the interferon-  
820 antagonist activity of the ebolavirus VP35 protein. *Virology*, 341, 179-89.
- 821 SAIKIA, P., GOPINATH, M. & SHAILA, M. S. 2008. Phosphorylation status of the phosphoprotein P of  
822 rinderpest virus modulates transcription and replication of the genome. *Arch Virol*, 153, 615-26.
- 823 SCHMID, S., MAYER, D., SCHNEIDER, U. & SCHWEMMLE, M. 2007. Functional characterization of the  
824 major and minor phosphorylation sites of the P protein of Borna disease virus. *J Virol*, 81, 5497-  
825 507.
- 826 SCHUMANN, M., GANTKE, T. & MUHLBERGER, E. 2009. Ebola virus VP35 antagonizes PKR activity  
827 through its C-terminal interferon inhibitory domain. *J Virol*, 83, 8993-7.
- 828 SHABMAN, R. S., HOENEN, T., GROSETH, A., JABADO, O., BINNING, J. M., AMARASINGHE, G. K.,  
829 FELDMANN, H. & BASLER, C. F. 2013. An upstream open reading frame modulates ebola virus  
830 polymerase translation and virus replication. *PLoS Pathog*, 9, e1003147.
- 831 SHEVCHENKO, A., TOMAS, H., HAVLI, J., OLSEN, J. V. & MANN, M. 2006. In-gel digestion for mass  
832 spectrometric characterization of proteins and proteomes. *Nature Protocols*, 1, 2856-2860.
- 833 SHI, W., HUANG, Y., SUTTON-SMITH, M., TISSOT, B., PANICO, M., MORRIS, H. R., DELL, A., HASLAM, S.  
834 M., BOYINGTON, J., GRAHAM, B. S., YANG, Z. Y. & NABEL, G. J. 2008. A filovirus-unique region of  
835 Ebola virus nucleoprotein confers aberrant migration and mediates its incorporation into virions.  
836 *J Virol*, 82, 6190-9.
- 837 SHU, T., GAN, T., BAI, P., WANG, X., QIAN, Q., ZHOU, H., CHENG, Q., QIU, Y., YIN, L., ZHONG, J. & ZHOU,  
838 X. 2019. Ebola virus VP35 has novel NTPase and helicase-like activities. *Nucleic Acids Res*.
- 839 SIEVERS, F. & HIGGINS, D. G. 2018. Clustal Omega for making accurate alignments of many protein  
840 sequences. *Protein Sci*, 27, 135-145.
- 841 SUGAI, A., SATO, H., YONEDA, M. & KAI, C. 2012. Phosphorylation of measles virus phosphoprotein at  
842 S86 and/or S151 downregulates viral transcriptional activity. *FEBS Lett*, 586, 3900-7.
- 843 TAKAMATSU, Y., KOLESNIKOVA, L. & BECKER, S. 2018. Ebola virus proteins NP, VP35, and VP24 are  
844 essential and sufficient to mediate nucleocapsid transport. *Proc Natl Acad Sci U S A*, 115, 1075-  
845 1080.
- 846 TIMANI, K. A., SUN, D., SUN, M., KEIM, C., LIN, Y., SCHMITT, P. T., SCHMITT, A. P. & HE, B. 2008. A single  
847 amino acid residue change in the P protein of parainfluenza virus 5 elevates viral gene  
848 expression. *J Virol*, 82, 9123-33.
- 849 TRUNSCHKE, M., CONRAD, D., ENTERLEIN, S., OLEJNIK, J., BRAUBURGER, K. & MUHLBERGER, E. 2013.  
850 The L-VP35 and L-L interaction domains reside in the amino terminus of the Ebola virus L protein  
851 and are potential targets for antivirals. *Virology*, 441, 135-45.
- 852 VILLANUEVA, N., HARDY, R., ASENJO, A., YU, Q. & WERTZ, G. 2000. The bulk of the phosphorylation of  
853 human respiratory syncytial virus phosphoprotein is not essential but modulates viral RNA  
854 transcription and replication. *Journal of General Virology*, 81, 129-133.
- 855 WANG, M., JIANG, Y. & XU, X. 2015. A novel method for predicting post-translational modifications on  
856 serine and threonine sites by using site-modification network profiles. *Molecular BioSystems*, 11,  
857 3092-3100.
- 858 WHO 2016. After Ebola in West Africa - Unpredictable risks, preventable epidemics. *New England*  
859 *Journal of Medicine*, 375, 587-596.
- 860 ZINZULA, L., ESPOSITO, F., MUHLBERGER, E., TRUNSCHKE, M., CONRAD, D., PIANO, D. & TRAMONTANO,  
861 E. 2009. Purification and functional characterization of the full length recombinant Ebola virus  
862 VP35 protein expressed in *E. coli*. *Protein Expr Purif*, 66, 113-9.

863 ZINZULA, L., NAGY, I., ORSINI, M., WEYHER-STINGL, E., BRACHER, A. & BAUMEISTER, W. 2019a.  
864 Structures of Ebola and Reston Virus VP35 Oligomerization Domains and Comparative  
865 Biophysical Characterization in All Ebolavirus Species. *Structure*, 27, 39-54.e6.

866 ZINZULA, L., NAGY, I., ORSINI, M., WEYHER-STINGL, E., BRACHER, A. & BAUMEISTER, W. 2019b.  
867 Structures of Ebola and Reston Virus VP35 Oligomerization Domains and Comparative  
868 Biophysical Characterization in All Ebolavirus Species. *Structure*, 27, 39-54 e6.

869

870

871

872 **Figure 1.** EBOV VP35 homo-oligomerization domain contains a putative regulatory serine  
873 phosphorylation site. (A) A schematic representation of VP35 domain organization. (B) Multiple  
874 sequence alignment of the homo-oligomerization domain of all ebolavirus species. Dashed gray  
875 box indicates the coiled coil region. Ser129 is highlighted in yellow. (C) MS/MS spectrum of the  
876 VP35 peptide 111-133 from affinity purified FLAG-VP35 for PTM prediction. FLAG-VP35 was  
877 overexpressed in HeLa cells, immunoprecipitated, resolved on 10% SDS-PAGE, stained with  
878 colloidal Coomassie Blue, and in-gel digested with trypsin. Eluted peptides were analyzed by a  
879 Thermo Orbitrap Fusion Lumos Tribrid mass spectrometer. The spectrum gives positive  
880 identification of ITSLENGLKPVYDMAKTISSLNR with a phosphorylation site predicted for  
881 Ser129.

882 **Figure 2.** VP35-S129A has moderately diminished oligomerization capacity. (A) CoIP  
883 experiment demonstrating that VP35-S129A retains the ability to interact with VP35-WT. IP was  
884 performed with anti-FLAG beads after expression of indicated plasmid in HeLa cells. Vector was  
885 used to keep amount of DNA transfected constant. (B) DSP cross-linking experiment  
886 demonstrating that VP35-S129A retains the capacity to oligomerize at levels near that of WT.  
887 HeLa cells were transfected with VP35-WT or VP35-S129A. Twenty-four h after transfection,  
888 cells were left untreated or treated with 1 mM of DSP. Asterisks denote oligomeric forms. (C)  
889 Quaternary structure analysis of EBOV VP35-WT oligomerization domain compared to S129A  
890 mutant by SEC-MALS. Absorbance peaks (280 nm) of protein retention volumes and absolute  
891 molecular masses under the main peak of each sample are indicated by continuous and dashed  
892 lines, respectively. (D) Thermal stability analysis of EBOV VP35-WT and S129A oligomerization  
893 domain by nanoDSF. Variation in the protein intrinsic 330/350 nm fluorescence ratio upon  
894 thermal denaturation and the corresponding first derivative curves are indicated by continuous  
895 and dashed lines, respectively. T<sub>m</sub> values are defined by the first derivative curve peak of each  
896 sample. (E) Far-UV CD spectra of EBOV VP35-WT and S129A oligomerization domain at  
897 different temperature values. The 222/208 nm MRE ratio value indicating the coiled-coil folding  
898 of each sample is annotated. (F) Secondary structure content analysis of EBOV VP35-WT and  
899 S129A oligomerization domain by CD spectra deconvolution with the CONTINLL method.  
900 Structure composition of  $\alpha$ -helices are indicated as percentages of the entire amino acid  
901 sequence.

902 **Figure 3.** Predicted phosphorylation at Ser129 of VP35 oligomerization domain implicates  
903 biological effect. (A) Comparison by computational modeling of VP35-WT (maroon) and VP35-  
904 S129A (grey) oligomerization domain. (B) Close-up. (C) Hydrogen bond network. (D)  
905 Phosphorylation at Ser129 of VP35 oligomerization domain.

906 **Figure 4.** VP35-S129A retains IFN antagonist function. (A) IFN- $\beta$  promoter activity in the  
907 presence of vector control (VC), VP35-WT (WT) or VP35-Ser129Ala (S129A). HEK293T cells  
908 were co-transfected with 60 ng of pGL-IFN- $\beta$ -luc, 10 ng pRL-TK, and decreasing amounts (100,  
909 10, 1.0, 0.1, 0.01 ng) of VC, WT, or S129A plasmid. Twenty-four h after transfection, cells were  
910 additionally transfected with IAV-RNA. After 24 h cells were lysed and luciferase activity was  
911 measured. (B) RT-qPCR assay of interferon-stimulated gene (ISG) expression upon IAV-RNA

912 stimulation in the presence of VC, WT, or S129A plasmids. HEK293T were transfected with  
913 2500 ng of VC, WT, or S129A plasmid. Twenty-four h after transfection, cells were stimulated  
914 with 2500 ng of IAV-RNA. After 24 h, total RNA was extracted, reverse transcribed, and  
915 subjected to quantitative real-time PCR (RT-qPCR) for the analysis of ISG15 and 2'-5'-  
916 oligoadenylate synthetase (OAS 2'-5') levels. mRNA expression levels were normalized to the  
917 level of glyceraldehyde-3-phosphate dehydrogenase (GAPDH). Data represent mean  $\pm$  SD  
918 (n=3) of two independent experiments. (C) Effect of VP35-WT and VP35-S129A on ISG56  
919 expression upon poly I:C stimulation. HeLa cells were left untransfected or transfected with  
920 VP35-WT or VP35-S129A. Twenty-four h after transfection, cells were left untreated or treated  
921 with 10  $\mu$ g/mL of poly I:C. After 24 h, cells were harvested and subjected to immunoblotting.  
922 Data represent mean  $\pm$  SD. \*p  $\leq$  0.05, \*\*p  $\leq$  0.01, \*\*\* p  $\leq$  0.001, \*\*\*\*  $\leq$  0.0001.

923 **Figure 5.** VP35-S129A abrogates EBOV minigenome activity and interaction with L<sub>1-505</sub>. A)  
924 Effect of VP35-WT and VP35-S129A on minigenome activity. HeLa cells were transfected with  
925 minigenome components (125 ng pCAGGS-HA-NP, 125 ng pCAGGS-FLAG-VP35, 50 ng  
926 pCAGGS-V5-VP30, 50 ng pRL-TK, 500 ng pCAGGS-L, and 750 ng of pCAGGS-3E5E-  
927 luciferase). Forty-eight h post-transfection, reporter activity was measured. Data represent  
928 mean  $\pm$  SEM from one representative experiment (n=3) of at least three independent  
929 experiments (B) Immunoblot confirmation of VP35-WT and VP35-S129A protein levels in the  
930 minigenome (C) CoIP experiment demonstrating that VP35-S129A retains the ability to interact  
931 with NP. (D) Representative IF images of FLAG-VP35-WT or HIS-VP35-S129A in the presence  
932 of HA-NP. (E) CoIP experiment demonstrating a lost interaction between VP35-S129A and L<sub>1-505</sub>.  
933 IPs in (C and E) were performed with anti-HA beads. FLAG-VP35-WT or HIS-VP35-S129A  
934 (red), HA-NP or HA-L<sub>1-505</sub>, Hoechst 33342 nuclear stain (blue) were visualized by confocal  
935 microscopy. Scale bars = 20  $\mu$ M. \*p  $\leq$  0.05.

936

937

938

939

940

941

942

943

944

945

946



947 **Figure 1**

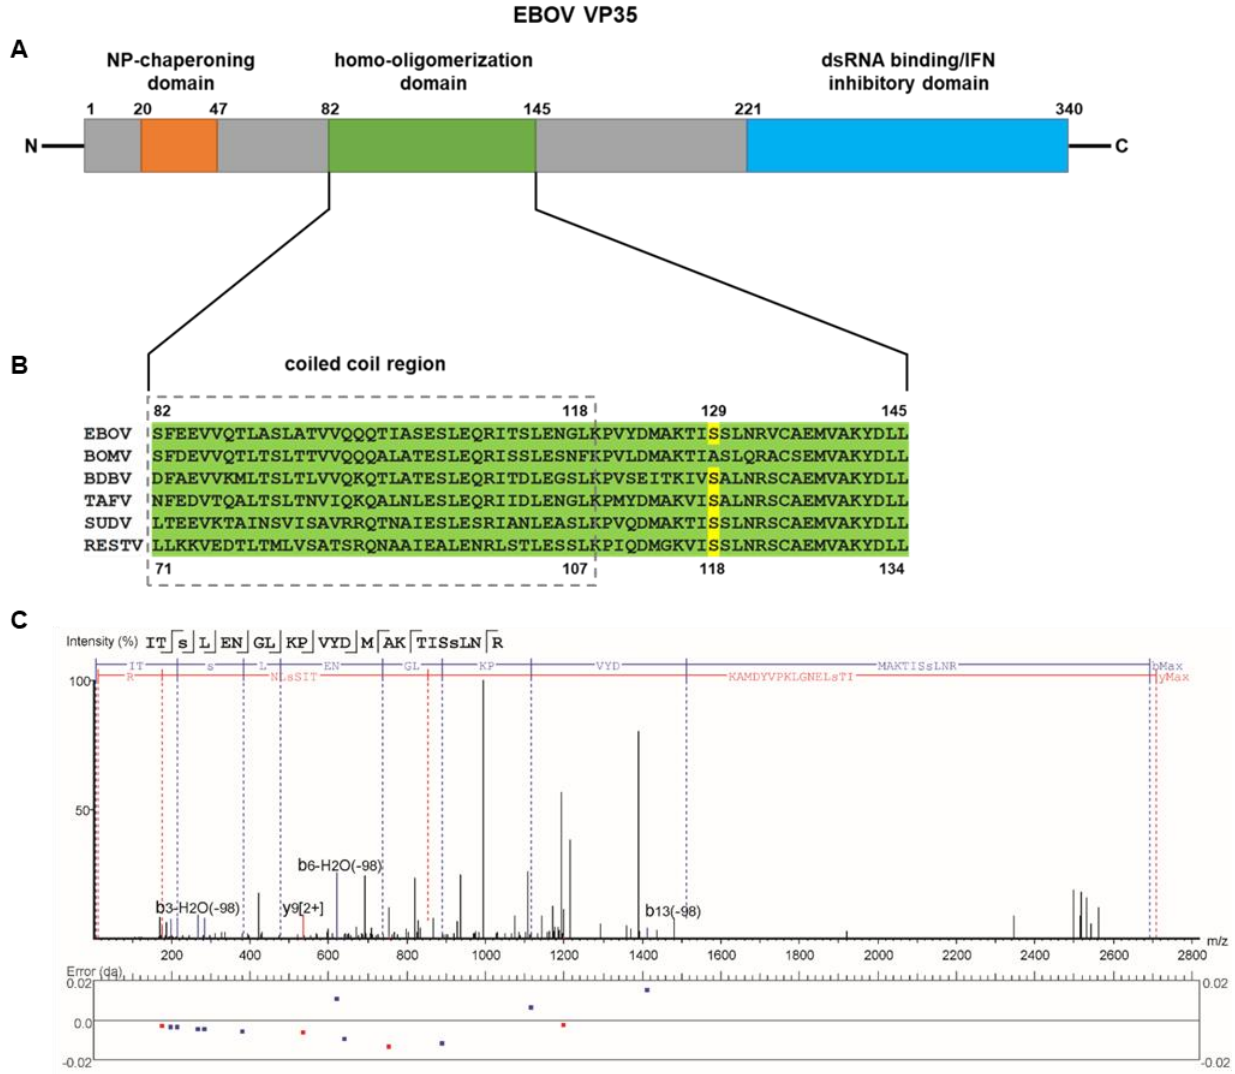

948

949

950

951

952

953

954

955

956

957 **Figure 2**

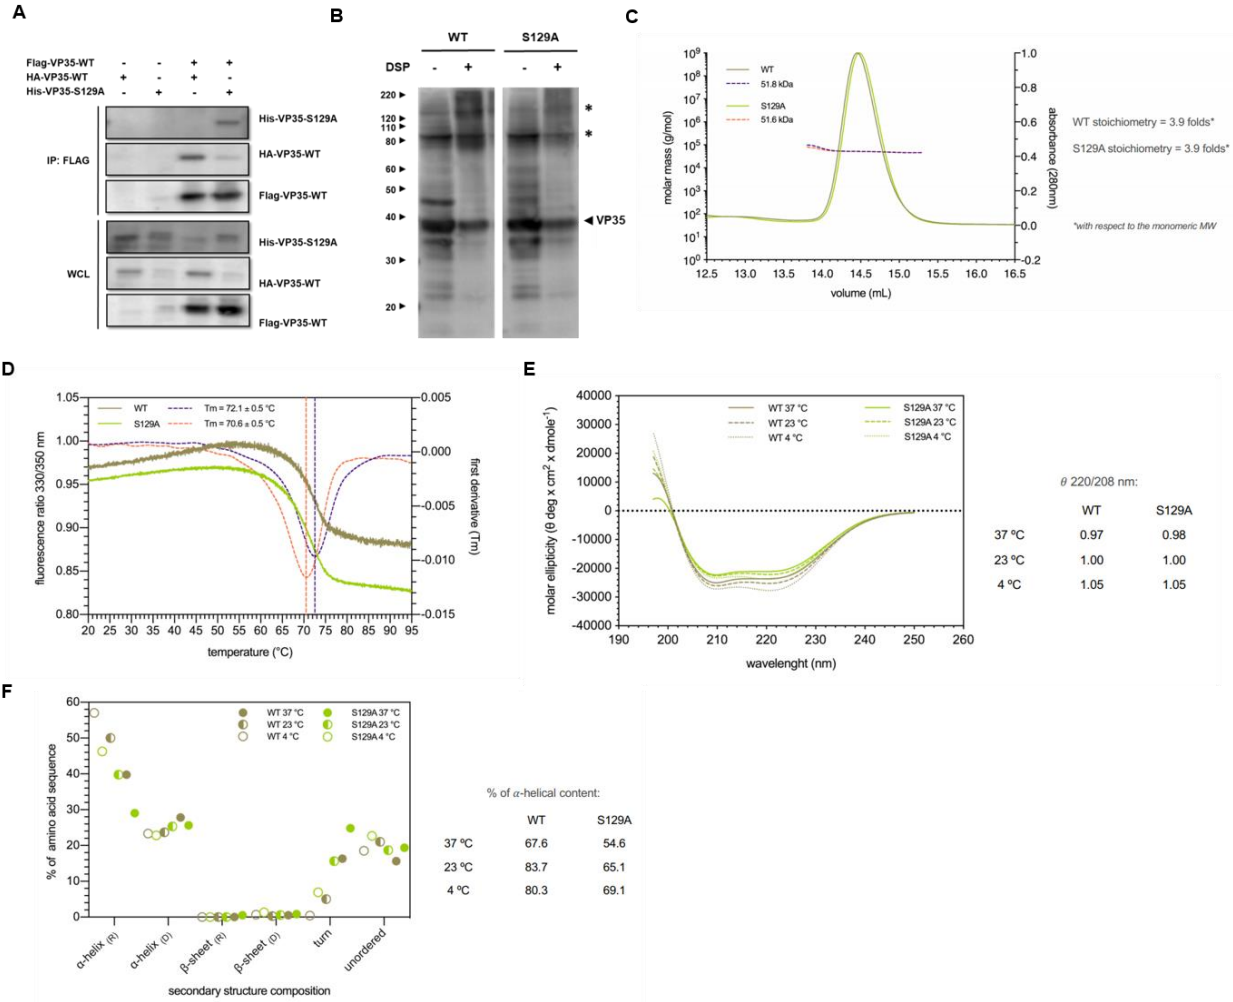

958

959

960

961

962

963

964

965

966

967

968 **Figure 3**

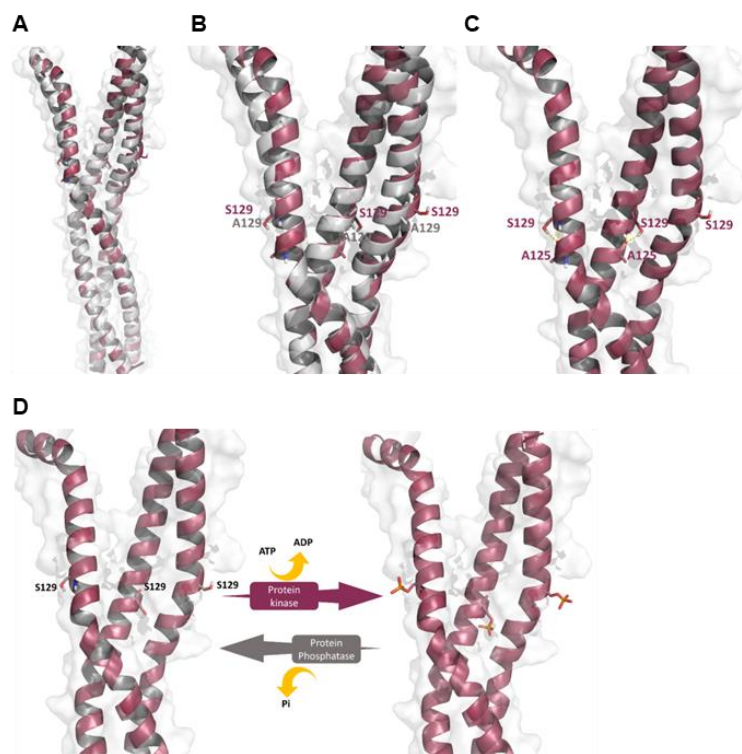

969

970

971

972

973

974

975

976

977

978 **Figure 4**

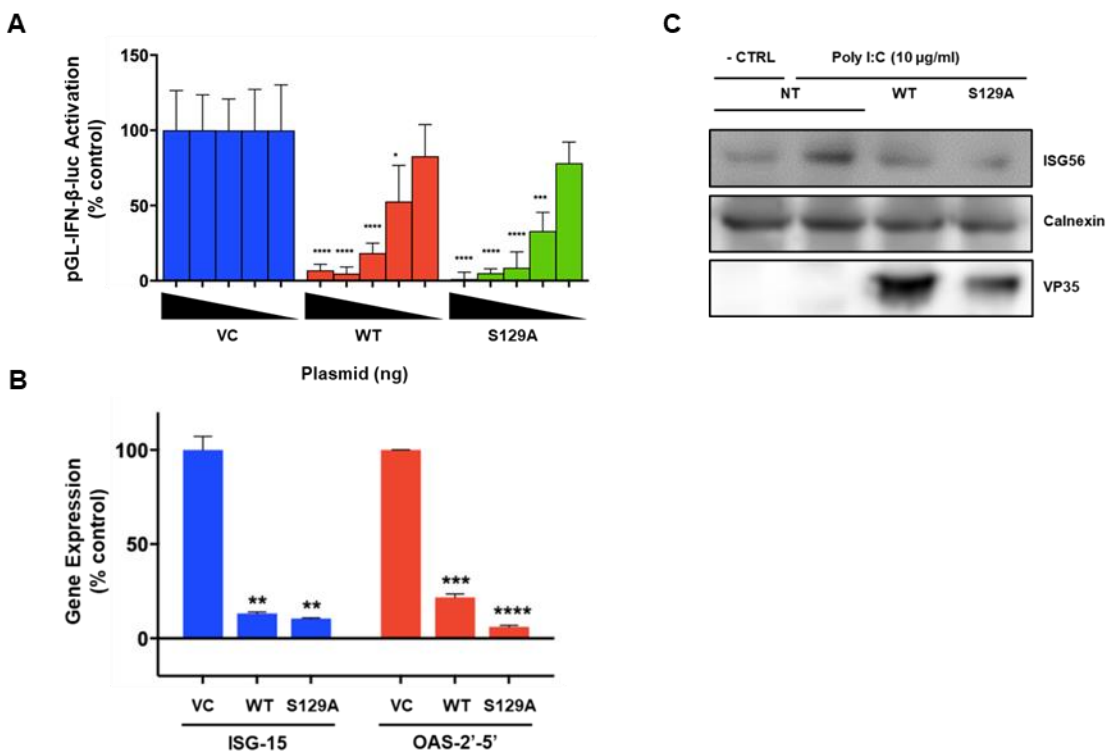

979

980

981

982

983

984

985

986

987

988

989

990

991

992

993

**Figure 5**

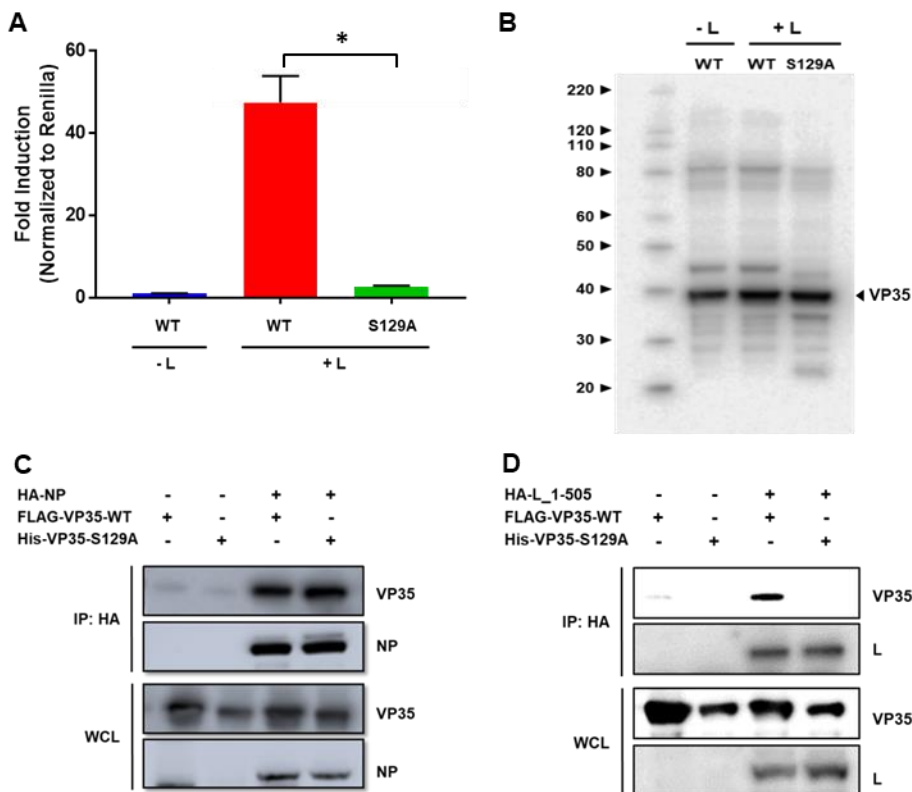

994

995

996

997

998

999

1000

1001

1002

1003

1004

1005

1006

1007
